# Supplementary material
Source: ML conference proceedings conference paper supplement (https://openreview.net/forum?id=L8-54wkift)
Supplement: supplementary_material [file attachment]

---

# Lower Bounds and Optimal Algorithms for Smooth and Strongly Convex Decentralized Optimization Over Time-Varying Networks

---

**Dmitry Kovalev**  
KAUST\*  
dakovalev1@gmail.com

**Elnur Gasanov**  
KAUST  
elnur.gasanov@kaust.edu.sa

**Alexander Gasnikov**  
MIPT<sup>†</sup> and ISP RAS<sup>‡</sup>  
gasnikov@yandex.ru

**Peter Richtárik**  
KAUST  
richtarik@gmail.com

## Abstract

We consider the task of minimizing the sum of smooth and strongly convex functions stored in a decentralized manner across the nodes of a communication network whose links are allowed to change in time. We solve two fundamental problems for this task. First, we establish *the first lower bounds* on the number of decentralized communication rounds and the number of local computations required to find an  $\epsilon$ -accurate solution. Second, we design two *optimal algorithms* that attain these lower bounds: (i) a variant of the recently proposed algorithm ADOM (Kovalev et al., 2021) enhanced via a multi-consensus subroutine, which is optimal in the case when access to the dual gradients is assumed, and (ii) a novel algorithm, called ADOM+, which is optimal in the case when access to the primal gradients is assumed. We corroborate the theoretical efficiency of these algorithms by performing an experimental comparison with existing state-of-the-art methods.

## 1 Introduction

In this work we are solving the decentralized optimization problem

$$\min_{x \in \mathbb{R}^d} \sum_{i=1}^n f_i(x), \quad (1)$$

where each function  $f_i: \mathbb{R}^d \rightarrow \mathbb{R}^d$  is stored on a compute node  $i \in \{1, \dots, n\}$ . We assume that the nodes are connected through a communication network. Each node can perform local computations based on its local state and data, and can directly communicate with its neighbors only. Further, we assume the functions  $f_i$  to be smooth and strongly convex.

Such decentralized optimization problems arise in many applications, including estimation by sensor networks (Rabbat and Nowak, 2004), network resource allocation (Beck et al., 2014), cooperative control (Giselsson et al., 2013), distributed spectrum sensing (Bazerque and Giannakis, 2009) and power system control (Gan et al., 2012). Moreover, problems of this form draw attention of the machine learning community (Scaman et al., 2017), since they cover training of supervised machine

---

\*King Abdullah University of Science and Technology, Thuwal, Saudi Arabia.

<sup>†</sup>Moscow Institute of Physics and Technology, Moscow, Russia

<sup>‡</sup>Institute for System Programming of the Russian Academy of Sciences, Research Center for Trusted Artificial Intelligence, Moscow, Russia

learning models through empirical risk minimization from the data stored across the nodes of a network as a special case. Finally, while the current federated learning (Konečný et al., 2016; McMahan et al., 2017) systems rely on a star network topology, with a trusted server performing aggregation and coordination placed at the center of the network, advances in decentralized optimization could be useful in new-generation federated learning formulations that would rely on fully decentralized computation (Li et al., 2020).

## 1.1 Time-varying Networks

In this work, we focus on the practically highly relevant and theoretically challenging situation when the *links in the communication network are allowed to change over time*. Such *time-varying networks* (Zadeh, 1961; Kolar et al., 2010) are ubiquitous in many complex systems and practical applications. In sensor networks, for example, changes in the link structure occur when the sensors are in motion, and due to other disturbances in the wireless signal connecting pairs of nodes. We envisage that a similar regime will be supported in future-generation federated learning systems (Konečný et al., 2016; McMahan et al., 2017), where the communication pattern among pairs of mobile devices or mobile devices and edge servers will be dictated by their physical proximity, which naturally changes over time.

## 1.2 Contributions

In this work we present the following key contributions:

1. **Lower bounds.** We establish the *first lower bounds* on decentralized communication and local computation complexities for solving problem (1) over *time-varying networks*. Our results are summarized in Table 1, and detailed in Section 3 (see Theorems 2 and 3 therein).
2. **Optimal algorithms.** Further, we prove that *these bounds are tight* by providing *two new optimal algorithms*<sup>4</sup> which match these lower bounds:
  - (i) a variant of the recently proposed algorithm ADOM (Kovalev et al., 2021) enhanced via a multi-consensus subroutine, and
  - (ii) a novel algorithm, called ADOM+ (Algorithm 1), also featuring multi-consensus.

The former method is optimal in the case when access to the dual gradients is assumed, and the latter one is optimal in the case when access to the primal gradients is assumed. See Sections 4 and 5 for details. To the best of our knowledge, ADOM with multi-consensus is the first dual based optimal decentralized algorithm for time-varying networks

3. **Experiments.** Through illustrative numerical experiments (see Section 6, and the extra experiments contained in the appendix) we demonstrate that our methods are *implementable*, and that they *perform competitively* when compared to existing baseline methods APM-C (Rogozin et al., 2020; Li et al., 2018) and Acc-GT (Li and Lin, 2021).

**Related Work.** When the communication network is fixed in time, decentralized distributed optimization in the strongly convex and smooth regime is relatively well studied. In particular, Scaman et al. (2017) established lower decentralized communication and local computation complexities for solving this problem, and proposed an optimal algorithm called MSDA in the case when an access to the dual oracle (gradient of the Fenchel transform of the objective function) is assumed. Under a primal oracle (gradient of the objective function), current state of the art includes the near-optimal algorithms APM-C (Li et al., 2018; Dvinskikh and Gasnikov, 2019) and Mudag (Ye et al., 2020), and a recently proposed optimal algorithm OPAPC (Kovalev et al., 2020).

The situation is worse in the time-varying case. To the best of our knowledge, no lower decentralized communication complexity bound exists for this problem. There are a few linearly-convergent algorithms, such as those of Nedic et al. (2017) and Push-Pull Gradient Method of Pu et al. (2020), that assume a primal oracle, and the dual oracle based algorithm PANDA due to Maros and Jaldén (2018). These algorithms have complicated theoretical analyses, which results in slow convergence rates. There are also several accelerated algorithms, which were originally developed for the fixed

<sup>4</sup>As a byproduct of our lower bounds, we show that the recently proposed method Acc-GT of Li and Lin (2021) is also optimal. This method appeared on arXiv in April 2021, at the time when we already had a first draft of this paper, including all results. Their work does not offer any lower bounds.

Table 1: Current theoretical state-of-the-art methods for solving problem (1) over time-varying networks, and our contributions: lower bounds (first lower bounds for this problem), and two new optimal algorithms, ADOM and ADOM+ with multi-consensus.

| Algorithm                                                  | Local computation complexity                                   | Decentralized communication complexity                                           | Gradient oracle |
|------------------------------------------------------------|----------------------------------------------------------------|----------------------------------------------------------------------------------|-----------------|
| <b>Known Results</b>                                       |                                                                |                                                                                  |                 |
| APM-C<br>(Rogozin et al., 2020)                            | $\mathcal{O}\left(\kappa^{1/2} \log \frac{1}{\epsilon}\right)$ | $\mathcal{O}\left(\chi \kappa^{1/2} \log^2 \frac{1}{\epsilon}\right)$            | primal          |
| Mudag<br>(Ye et al., 2020)                                 | $\mathcal{O}\left(\kappa^{1/2} \log \frac{1}{\epsilon}\right)$ | $\mathcal{O}\left(\chi \kappa^{1/2} \log(\kappa) \log \frac{1}{\epsilon}\right)$ | primal          |
| Acc-GT with multi-consensus<br>(Li and Lin, 2021)          | $\mathcal{O}\left(\kappa^{1/2} \log \frac{1}{\epsilon}\right)$ | $\mathcal{O}\left(\chi \kappa^{1/2} \log \frac{1}{\epsilon}\right)$              | primal          |
| <b>Our Results</b>                                         |                                                                |                                                                                  |                 |
| ADOM with multi-consensus<br>This Paper, Theorem 5         | $\mathcal{O}\left(\kappa^{1/2} \log \frac{1}{\epsilon}\right)$ | $\mathcal{O}\left(\chi \kappa^{1/2} \log \frac{1}{\epsilon}\right)$              | dual            |
| ADOM+ with multi-consensus<br>This Paper, Theorem 6        | $\mathcal{O}\left(\kappa^{1/2} \log \frac{1}{\epsilon}\right)$ | $\mathcal{O}\left(\chi \kappa^{1/2} \log \frac{1}{\epsilon}\right)$              | primal          |
| <b>Lower Bounds</b><br><b>This Paper, Theorems 2 and 3</b> | $\mathcal{O}\left(\kappa^{1/2} \log \frac{1}{\epsilon}\right)$ | $\mathcal{O}\left(\chi \kappa^{1/2} \log \frac{1}{\epsilon}\right)$              | both            |

network case, and can be extended to the time-varying case. These include Acc-DNGD (Qu and Li, 2019), Mudag (Ye et al., 2020) and a variant of APM-C which was extended to the time-varying case by Rogozin et al. (2020). Finally, there are two algorithms with state-of-the-art decentralized communication complexity: a dual based algorithm ADOM (Kovalev et al., 2021), and a primal based algorithm Acc-GT (Li and Lin, 2021).

## 2 Notation and Assumptions

### 2.1 Smooth and Strongly Convex Regime

Throughout this paper we restrict each function  $f_i(x)$  to be  $L$ -smooth and  $\mu$ -strongly convex. That is, we require the following inequalities to hold for all  $x, y \in \mathbb{R}^d$  and  $i \in \{1, \dots, n\}$ :

$$f_i(y) + \langle \nabla f_i(y), x - y \rangle + \frac{\mu}{2} \|x - y\|^2 \leq f_i(x) \leq f_i(y) + \langle \nabla f_i(y), x - y \rangle + \frac{L}{2} \|x - y\|^2. \quad (2)$$

This naturally leads to the quantity  $\kappa = \frac{L}{\mu}$  known as the condition number of function  $f_i$ . Strong convexity implies that problem (1) has a unique solution.

### 2.2 Primal and Dual Oracle

In our work we consider two types of gradient oracles. By *primal oracle* we denote the situation when the gradients  $\nabla f_i$  of the objective functions  $f_i$  are available. By *dual oracle* we denote the situation when the gradients  $\nabla f_i^*$  of the Fenchel conjugates<sup>5</sup>  $f_i^*$  of the objective functions  $f_i$  are available.

### 2.3 Decentralized Communication

Let  $\mathcal{V} = \{1, \dots, n\}$  denote the set of the compute nodes. We assume that decentralized communication is split into communication rounds. At each round  $q \in \{0, 1, 2, \dots\}$ , nodes are connected through a communication network represented by a graph  $\mathcal{G}^q = (\mathcal{V}, \mathcal{E}^q)$ , where  $\mathcal{E}^q \subset \{(i, j) \in \mathcal{V} \times \mathcal{V} : i \neq j\}$  is the set of links at round  $q$ . For each node  $i \in \mathcal{V}$  we consider a set of its immediate neighbors at round  $q$ :  $\mathcal{N}_i^q = \{j \in \mathcal{V} : (i, j) \in \mathcal{E}^q\}$ . At round  $q$ , each node  $i \in \mathcal{V}$  can communicate with nodes from the set  $\mathcal{N}_i^q$  only. This type of communication is known in the literature as decentralized communication.

<sup>5</sup>Recall that the Fenchel conjugate of  $f_i$  is given as  $f_i^*(x) = \sup_{y \in \mathbb{R}^d} [\langle x, y \rangle - f_i(y)]$ . Note, that  $f_i^*$  is  $1/\mu$ -smooth and  $1/L$ -strongly convex (Rockafellar, 2015).

## 2.4 Gossip Matrices

Decentralized communication between nodes is typically represented via a matrix-vector multiplication with a gossip matrix. For each decentralized communication round  $q \in \{0, 1, 2, \dots\}$ , consider a matrix  $\mathbf{W}(q) \in \mathbb{R}^{n \times n}$  satisfying the following assumption.

**Assumption 1.** For any  $q \in \{0, 1, 2, \dots\}$  matrix  $\mathbf{W}(q) \in \mathbb{R}^{n \times n}$  satisfies the following relations:

1.  $\mathbf{W}(q)_{i,j} = 0$  if  $i \neq j$  and  $(i, j) \notin \mathcal{E}^q$ ,
2.  $\ker \mathbf{W}(q) \supset \{(x_1, \dots, x_n) \in \mathbb{R}^n : x_1 = \dots = x_n\}$ ,
3.  $\text{range} \mathbf{W}(q) \subset \{(x_1, \dots, x_n) \in \mathbb{R}^n : \sum_{i=1}^n x_i = 0\}$ ,
4. There exists  $\chi \geq 1$ , such that
 
$$\|\mathbf{W}x - x\|^2 \leq (1 - \chi^{-1})\|x\|^2 \text{ for all } x \in \{(x_1, \dots, x_n) \in \mathbb{R}^n : \sum_{i=1}^n x_i = 0\}. \quad (3)$$

Throughout this paper we will refer to the matrix  $\mathbf{W}(q)$  as the *gossip matrix*. A typical example of a gossip matrix is  $\mathbf{W}(q) = \lambda_{\max}^{-1}(\mathbf{L}(q)) \cdot \mathbf{L}(q)$ , where  $\mathbf{L}(q)$  the Laplacian of an undirected connected graph  $\mathcal{G}^q$ . Note that in this case  $\mathbf{W}(q)$  is symmetric and positive semi-definite, and  $\chi$  can be chosen as an upper-bound on the condition number of the matrix  $\mathbf{L}(q)$  defined by  $\chi = \sup_q \frac{\lambda_{\max}(\mathbf{L}(q))}{\lambda_{\min}^+(\mathbf{L}(q))}$ , where  $\lambda_{\max}(\mathbf{L}(q))$  and  $\lambda_{\min}^+(\mathbf{L}(q))$  denote the largest and the smallest positive eigenvalue of  $\mathbf{L}(q)$ , respectively. With a slight abuse of language, we will call  $\chi$  the *condition number of time-varying network* even when the gossip matrices  $\mathbf{W}(q)$  are not necessarily symmetric.

While the notion of a gossip matrix is typically used in the fixed network setting (Scaman et al., 2017), we adapt this notion to the time-varying regime in which the so-called mixing matrices (Nedic et al., 2017) are typically used instead. However, it turns out that there is no major difference between these notions. While we decided to present our main results in the language of gossip matrices, they can alternatively be described in the language of mixing matrices instead. We provide a detailed discussion of this in the appendix.

## 3 Lower Complexity Bounds

In this section we obtain lower bounds on the decentralized communication and local computation complexities for solving problem (1). These lower bounds apply to algorithms which belong to a certain class, which we call *First-order Decentralized Algorithms*. Algorithms from this class need to satisfy the following assumptions:

1. Each compute node can calculate first-order characteristics, such as gradient of the function it stores, or its Fenchel conjugate.
2. Each compute node can communicate values, such as vectors from  $\mathbb{R}^d$ , with its neighbors. Note that the set of neighbors for each node is not fixed in time.

We repeat here that when the network is fixed in time, lower decentralized communication and local computation complexity bounds were obtained by Scaman et al. (2017).

### 3.1 First-order Decentralized Algorithms

Here we give a formal definition of the class of algorithms for which we provide lower bounds on the complexity of solving problem (1). At each time step  $k \in \{0, 1, 2, \dots\}$ , each node  $i \in \mathcal{V}$  maintains a finite local memory  $\mathcal{H}_i(k) \subset \mathbb{R}^d$ . For simplicity, we assume that the local memory is initialized as  $\mathcal{H}_i(k) = \{0\}$ .

At each time step  $k$ , an algorithm either performs a decentralized communication round, or a local computation round that can update the memory  $\mathcal{H}_i(k)$ . The update of the local memory satisfies the following rules:

1. If an algorithm performs a local computation round at time step  $k$ , then
 
$$\mathcal{H}_i(k+1) \subset \text{Span}(\{x, \nabla f_i(x), \nabla f_i^*(x) : x \in \mathcal{H}_i(k)\})$$
 for all  $i \in \mathcal{V}$ , where  $f_i^*$  is the Fenchel conjugate of  $f_i$ .

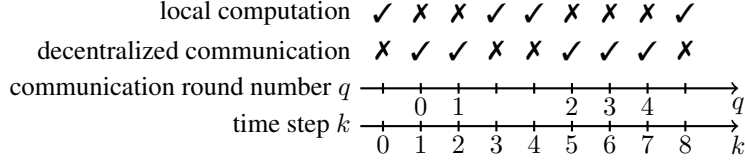

Figure 1: The way we count decentralized communication rounds ( $q$ ) and iterations ( $k$ ).

2. If an algorithm performs a decentralized communication round at time step  $k$ , then

$$\mathcal{H}_i(k+1) \subset \text{Span} \left( \bigcup_{j \in \mathcal{N}_i^q \cup \{i\}} \mathcal{H}_j(k) \right)$$

for all  $i \in \mathcal{V}$ , where  $q \in \{0, 1, 2, \dots\}$  refers to the number of decentralized communication round performed so far, counting from the first one, for which we set  $q = 0$ . See Figure 1 for a graphical illustration of our time step ( $k$ ) and decentralized communication ( $q$ ) counters.

At time step  $k$ , each node  $i \in \mathcal{V}$  must specify an output value  $x_i^o(k) \in \mathcal{H}_i(k)$ .

In the case of time-invariant networks, Scaman et al. (2017) presented lower complexity bounds for a class of algorithms called *Black-box Optimization Procedures*. This class is slightly more general than our First-order Decentralized Algorithms. In particular, we use discrete time  $k \in \{0, 1, 2, \dots\}$  rather than continuous time, and do not allow decentralized communications and local computations to be performed in parallel and asynchronously. We have done this for the sake of simplicity and clarity. This should not be seen as a weakness of our work, since our results can be easily extended to Black-box Optimization Procedures. However, we are of the opinion that such an extension would not give any new substantial insights.

### 3.2 Main Theorems

We are now ready to present our main theorems describing the first lower bounds on the number of decentralized communication rounds and local computation rounds that are necessary to find an approximate solution of the problem (1). In order to simplify the proofs, and following the approach used by Nesterov (2003), we consider the limiting case  $d \rightarrow +\infty$ . More precisely, we will work in the infinite dimensional space  $\ell_2 = \{x = (x_{[l]})_{l=1}^{\infty} : \sum_{l=1}^{\infty} (x_{[l]})^2 < +\infty\}$  rather than  $\mathbb{R}^d$ .

**Theorem 1.** *Let  $\chi \geq 3$ ,  $L > \mu \geq 0$ . There exists a sequence of graphs  $\{\mathcal{G}^q\}_{q=0}^{\infty}$ , a corresponding sequence of gossip matrices  $\{\mathbf{W}(q)\}_{q=0}^{\infty} \subset \mathbb{R}^{n \times n}$  satisfying the Assumption 1, and  $\mu$ -strongly convex and  $L$ -smooth functions  $f_i : \ell_2 \rightarrow \mathbb{R}, i \in \mathcal{V}$ , such that for any first-order decentralized algorithm and any  $k \in \{0, 1, 2, \dots\}$*

$$\|x_i^o(k) - x^*\|^2 \geq C \left( \max \left\{ 0, 1 - \frac{24\sqrt{6}\mu}{\sqrt{L}} \right\} \right)^{q/\chi}, \quad (4)$$

where  $q$  is the number of decentralized communication rounds performed by the algorithm before time step  $k$ ,  $x^*$  is the solution of the problem (1) and  $C > 0$  is some constant.

Our proof is inspired by the proof of Scaman et al. (2017) for time-invariant networks, which in its turn is based on the proof of oracle complexities for strongly convex and smooth optimization by Nesterov (2003). Here we give a short outline of our proof.

We choose  $n = |\mathcal{V}| \approx \chi$  nodes and split them into three disjoint sets,  $\mathcal{V}_1, \mathcal{V}_2$  and  $\mathcal{V}_3$ , of equal size  $n/3$ . Further, we split the function used by Nesterov (2003) onto the nodes belonging to  $\mathcal{V}_1$  and  $\mathcal{V}_3$ . One then needs to show that most dimensions of the output vectors  $x_i^o(k)$  will remain zero, while local computations may only increase the number of non-zero dimensions by one. In contrast to (Scaman et al., 2017), we need to have  $|\mathcal{V}_2| \approx \chi$  rather than  $|\mathcal{V}_2| \approx \sqrt{\chi}$ , and still ensure that at least  $|\mathcal{V}_2|$  decentralized communication rounds are necessary to share information between node groups  $\mathcal{V}_1$  and  $\mathcal{V}_3$ . We achieve this by choosing a sequence of star graphs with the center node cycling through the nodes from  $\mathcal{V}_2$ .

**Theorem 2.** *For any  $\chi \geq 3$ ,  $L > \mu \geq 0$  there exists a sequence of graphs  $\{\mathcal{G}^q\}_{q=0}^{\infty}$ , a corresponding sequence of gossip matrices  $\{\mathbf{W}(q)\}_{q=0}^{\infty} \subset \mathbb{R}^{n \times n}$  satisfying the Assumption 1, and  $\mu$ -strongly convex*

and  $L$ -smooth functions  $f_i : \ell_2 \rightarrow \mathbb{R}, i \in \mathcal{V}$ , such that for any first order decentralized algorithm, the number of decentralized communication rounds to find an  $\epsilon$ -accurate solution of the problem (1) is lower bounded by

$$\Omega \left( \chi \sqrt{L/\mu} \log \frac{1}{\epsilon} \right). \quad (5)$$

We also provide a lower bound on the local computation complexity. The proof is similar to the proof of Theorem 1.

**Theorem 3.** For any  $\chi \geq 3, L > \mu \geq 0$  there exists a sequence of graphs  $\{\mathcal{G}^q\}_{q=0}^\infty$ , a corresponding sequence of gossip matrices  $\{\mathbf{W}(q)\}_{q=0}^\infty \subset \mathbb{R}^{n \times n}$  satisfying the Assumption 1, and  $\mu$ -strongly convex and  $L$ -smooth functions  $f_i : \ell_2 \rightarrow \mathbb{R}, i \in \mathcal{V}$ , such that for any first order decentralized algorithm, the number of local computation rounds to find an  $\epsilon$ -accurate solution of the problem (1) is lower bounded by

$$\Omega \left( \sqrt{L/\mu} \log \frac{1}{\epsilon} \right). \quad (6)$$

The detailed proofs are available in the appendix.

## 4 Primal Algorithm with Optimal Communication Complexity

In this section we develop a novel algorithm for decentralized optimization over time-varying networks with optimal decentralized communication complexity. This is a primal algorithm, meaning that it uses the primal gradient oracle. The design of this algorithm relies on a sequence of specific reformulations of the problem (1), which we now describe.

### 4.1 Reformulation via Lifting

Consider a function  $F : (\mathbb{R}^d)^\mathcal{V} \rightarrow \mathbb{R}$  defined by

$$F(x) = \sum_{i \in \mathcal{V}} f_i(x_i), \quad (7)$$

where  $x = (x_1, \dots, x_n) \in (\mathbb{R}^d)^\mathcal{V}$ . This function is  $L$ -smooth and  $\mu$ -strongly convex since the individual functions  $f_i$  are. Consider also the so called consensus space  $\mathcal{L} \subset (\mathbb{R}^d)^\mathcal{V}$  defined by

$$\mathcal{L} = \{(x_1, \dots, x_n) \in (\mathbb{R}^d)^\mathcal{V} : x_1 = \dots = x_n\}. \quad (8)$$

Using this notation, we arrive at the equivalent formulation of problem (1)

$$\min_{x \in \mathcal{L}} F(x). \quad (9)$$

Due to strong convexity, this reformulation has a unique solution, which we denote as  $x^* \in \mathcal{L}$ .

### 4.2 Saddle Point Reformulation

Next, we introduce a reformulation of problem (9) using a parameter  $\nu \in (0, \mu)$  and a slack variable  $w \in (\mathbb{R}^d)^\mathcal{V}$ :

$$\min_{\substack{x, w \in (\mathbb{R}^d)^\mathcal{V} \\ w = x, w \in \mathcal{L}}} F(x) - \frac{\nu}{2} \|x\|^2 + \frac{\nu}{2} \|w\|^2.$$

Note that the function  $F(x) - \frac{\nu}{2} \|x\|^2$  is  $(\mu - \nu)$ -strongly convex since  $\nu < \mu$ . The latter problem is a minimization problem with linear constraints. Hence, it has the equivalent saddle-point reformulation

$$\min_{x, w \in (\mathbb{R}^d)^\mathcal{V}} \max_{y \in (\mathbb{R}^d)^\mathcal{V}} \max_{z \in \mathcal{L}^\perp} F(x) - \frac{\nu}{2} \|x\|^2 + \frac{\nu}{2} \|w\|^2 + \langle y, w - x \rangle + \langle z, w \rangle,$$

where  $\mathcal{L}^\perp \subset (\mathbb{R}^d)^\mathcal{V}$  is an orthogonal complement to the space  $\mathcal{L}$ , defined by

$$\mathcal{L}^\perp = \{(z_1, \dots, z_n) \in (\mathbb{R}^d)^\mathcal{V} : \sum_{i=1}^n z_i = 0\}. \quad (10)$$

Minimization in  $w$  gives the final saddle-point reformulation of the problem (9):

$$\min_{x \in (\mathbb{R}^d)^\mathcal{V}} \max_{y \in (\mathbb{R}^d)^\mathcal{V}} \max_{z \in \mathcal{L}^\perp} F(x) - \frac{\nu}{2} \|x\|^2 - \langle y, x \rangle - \frac{1}{2\nu} \|y + z\|^2. \quad (11)$$

Further, by  $\mathbb{E}$  we denote the Euclidean space  $\mathbb{E} = (\mathbb{R}^d)^\nu \times (\mathbb{R}^d)^\nu \times \mathcal{L}^\perp$ . One can show that the saddle-point problem (11) has a unique solution  $(x^*, y^*, z^*) \in \mathbb{E}$ , which satisfies the following optimality conditions:

$$0 = \nabla F(x^*) - \nu x^* - y^*, \quad (12)$$

$$0 = \nu^{-1}(y^* + z^*) + x^*, \quad (13)$$

$$\mathcal{L} \ni y^* + z^*. \quad (14)$$

### 4.3 Monotone Inclusion Reformulation

Consider two monotone operators  $A, B: \mathbb{E} \rightarrow \mathbb{E}$ , defined via

$$A(x, y, z) = \begin{bmatrix} \nabla F(x) - \nu x \\ \nu^{-1}(y + z) \\ \mathbf{P}\nu^{-1}(y + z) \end{bmatrix}, \quad B(x, y, z) = \begin{bmatrix} -y \\ x \\ 0 \end{bmatrix}, \quad (15)$$

where  $\mathbf{P}$  is an orthogonal projection matrix onto the subspace  $\mathcal{L}^\perp$ . Matrix  $\mathbf{P}$  is given as

$$\mathbf{P} = (\mathbf{I}_n - \frac{1}{n}\mathbf{1}_n\mathbf{1}_n^\top) \otimes \mathbf{I}_d, \quad (16)$$

where  $\mathbf{I}_p$  denotes  $p \times p$  identity matrix,  $\mathbf{1}_n = (1, \dots, 1) \in \mathbb{R}^n$ , and  $\otimes$  is the Kronecker product. Then, solving problem (11) is equivalent to finding  $(x^*, y^*, z^*) \in \mathbb{E}$ , such that

$$A(x^*, y^*, z^*) + B(x^*, y^*, z^*) = 0. \quad (17)$$

Indeed, optimality condition (14) is equivalent to  $\text{proj}_{\mathcal{L}^\perp}(y^* + z^*) = 0$  or  $\mathbf{P}\nu^{-1}(y^* + z^*) = 0$ . Now, it is clear that (17) is just another way to write the optimality conditions for problem (11).

### 4.4 Primal Algorithm Design and Convergence

A common approach to solving problem (17) is to use the Forward-Backward algorithm. The update rule of this algorithm is  $(x^+, y^+, z^+) = J_{\omega B}[(x, y, z) - \omega A(x, y, z)]$ , where  $\omega > 0$  is a stepsize, the operator  $J_{\omega B}: \mathbb{E} \rightarrow \mathbb{E}$  is called the resolvent, and is defined as the inverse of the operator  $(I + \omega B): \mathbb{E} \rightarrow \mathbb{E}$ , where  $I: \mathbb{E} \rightarrow \mathbb{E}$  is the identity mapping. One can observe that the resolvent  $J_{\omega B}$  is easy to compute.

Following (Kovalev et al., 2020), we use an accelerated version of the Forward-Backward algorithm. This can indeed be done, since the operator  $A: \mathbb{E} \rightarrow \mathbb{E}$  is the gradient of the smooth and convex function  $(x, y, z) \mapsto F(x) - \frac{\nu}{2}\|x\|^2 + \frac{1}{2\nu}\|y + z\|^2$  on the Euclidean space  $\mathbb{E}$ . Note that the operator  $A + B$  is *not* strongly monotone, while strong monotonicity is usually required to achieve linear convergence. However, we can still obtain a linear convergence rate by carefully utilizing the  $L$ -smoothness property of the function  $F(x)$ . Similar issue appeared in the design of algorithms for solving linearly-constrained minimizations problems, including the non-accelerated algorithms (Condat et al., 2019; Salim et al., 2020) and the optimal algorithm (Salim et al., 2021). However, the authors of these works considered a different problem reformulation from (11), and hence their results can not be applied here.

However, one issue still remains: to compute the operator  $A$ , it is necessary to perform a matrix-vector multiplication with the matrix  $\mathbf{P}$ , which requires full averaging, i.e., consensus over all nodes of the network. Following the approach of Kovalev et al. (2021), we replace it with the multiplication via the gossip matrix  $\mathbf{W}(q) \otimes \mathbf{I}_d$ , which requires one decentralized communication round only. That is, we replace the last component  $\mathbf{P}\nu^{-1}(y + z)$  of the operator  $A$  defined by (15) with  $(\mathbf{W}(q) \otimes \mathbf{I}_d)\nu^{-1}(y + z)$ . Kovalev et al. (2021) showed that multiplication with the gossip matrix can be seen as a compression on the Euclidean space  $\mathcal{L}^\perp$ , i.e., condition (3) holds, and hence the so-called error-feedback mechanism (Stich and Karimireddy, 2019; Karimireddy et al., 2019; Gorbunov et al., 2020) can be applied to obtain linear convergence. We use this insight in the design of our algorithm.

Armed with all these ideas, we are ready to present our method ADOM+; see Algorithm 1.

---

**Algorithm 1** ADOM+

---

1: **input:**  $x^0, y^0, m^0 \in (\mathbb{R}^d)^\nu, z^0 \in \mathcal{L}^\perp$   
2:  $x_f^0 = x^0, y_f^0 = y^0, z_f^0 = z^0$   
3: **for**  $k = 0, 1, 2, \dots$  **do**  
4:  $x_g^k = \tau_1 x^k + (1 - \tau_1) x_f^k$   
5:  $x^{k+1} = x^k + \eta \alpha (x_g^k - x^{k+1}) - \eta [\nabla F(x_g^k) - \nu x_g^k - y^{k+1}]$   
6:  $x_f^{k+1} = x_g^k + \tau_2 (x^{k+1} - x^k)$   
7:  $y_g^k = \sigma_1 y^k + (1 - \sigma_1) y_f^k$   
8:  $y^{k+1} = y^k + \theta \beta (\nabla F(x_g^k) - \nu x_g^k - y^{k+1}) - \theta [\nu^{-1} (y_g^k + z_g^k) + x^{k+1}]$   
9:  $y_f^{k+1} = y_g^k + \sigma_2 (y^{k+1} - y^k)$   
10:  $z_g^k = \sigma_1 z^k + (1 - \sigma_1) z_f^k$   
11:  $z^{k+1} = z^k + \gamma \delta (z_g^k - z^k) - (\mathbf{W}(k) \otimes \mathbf{I}_d) [\gamma \nu^{-1} (y_g^k + z_g^k) + m^k]$   
12:  $m^{k+1} = \gamma \nu^{-1} (y_g^k + z_g^k) + m^k - (\mathbf{W}(k) \otimes \mathbf{I}_d) [\gamma \nu^{-1} (y_g^k + z_g^k) + m^k]$   
13:  $z_f^{k+1} = z_g^k - \zeta (\mathbf{W}(k) \otimes \mathbf{I}_d) (y_g^k + z_g^k)$   
14: **end for**

---

We now establish the convergence rate of Algorithm 1.

**Theorem 4** (Convergence of ADOM+). *To reach precision  $\|x^k - x^*\|^2 \leq \epsilon$ , Algorithm 1 requires the following number of iterations*

$$\mathcal{O} \left( \chi \sqrt{L/\mu} \log \frac{1}{\epsilon} \right).$$

Note that Algorithm 1 performs  $\mathcal{O}(1)$  decentralized communication and local computation rounds. Hence, its decentralized communication and local computation complexities are  $\mathcal{O} \left( \chi \sqrt{L/\mu} \log \frac{1}{\epsilon} \right)$ .

## 5 Optimal Algorithms

In this section we develop decentralized algorithms for time-varying networks with optimal local computation and decentralized communication complexities. We develop both primal and dual algorithms that use primal and dual gradient oracle, respectively. The key mechanism to obtain optimal algorithms is to incorporate the multi-consensus procedure into the algorithms with optimal decentralized communication complexity.

### 5.1 Multi-consensus Procedure

As discussed in Section 2.4, a decentralized communication round can be represented as the multiplication with the gossip matrix  $\mathbf{W}(q)$ . The main idea behind the multi-consensus procedure is to replace the matrix  $\mathbf{W}(q)$  with another matrix, namely

$$\mathbf{W}(k; T) = \mathbf{I}_n - \prod_{q=kT}^{(k+1)T-1} (\mathbf{I}_n - \mathbf{W}(q)), \quad (18)$$

where  $k \in \{0, 1, 2, \dots\}$  is the iteration counter, and  $T \in \{1, 2, \dots\}$  is the number of consensus steps. One can show that this matrix satisfies the Assumption 1, including the contraction property (3):

$$\|\mathbf{W}(k; T)x - x\|^2 \leq (1 - \chi^{-1})^T \|x\|^2 \text{ for all } x \in \mathcal{L}^\perp. \quad (19)$$

One can also observe that multiplication with the matrix  $\mathbf{W}(k; T)$  requires to perform multiplication with  $T$  gossip matrices  $\mathbf{W}(kT), \mathbf{W}(kT+1), \dots, \mathbf{W}(kT+T-1)$ , hence it requires  $T$  decentralized communication rounds.

### 5.2 Optimal Algorithms: ADOM and ADOM+ with multi-consensus

Now, we are ready to describe our optimal algorithms for smooth and strongly decentralized optimization over time-varying networks. As mentioned before, we start with algorithms with optimal



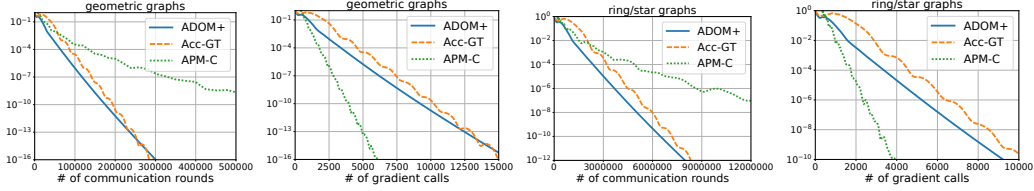

Figure 2: Comparison of our method ADOM+ and the baselines Acc-GT and APM-C.

decentralized communication complexity. In the case when access to the primal oracle is assumed, ADOM+ (Algorithm 1) is the algorithm of choice. In the case when access to the dual oracle is assumed, Kovalev et al. (2021) proposed the dual based accelerated decentralized algorithm ADOM. The original convergence proof of this algorithm requires the gossip matrix  $\mathbf{W}(k)$  to be symmetric. However, the generalization of this proof to the case when the gossip matrix satisfies Assumption 1, and is not necessarily symmetric, is straightforward.

Both ADOM and ADOM+ require  $\mathcal{O}\left(\chi\sqrt{L/\mu}\log\frac{1}{\epsilon}\right)$  iterations to obtain an  $\epsilon$ -accurate solution of problem (1), and at each iteration they perform  $\mathcal{O}(1)$  local computation and decentralized communication rounds, i.e., multiplications with the gossip matrix  $\mathbf{W}(q)$ . We now incorporate a multi-consensus procedure into both algorithms. That is, we replace matrix  $\mathbf{W}(q)$  with the matrix  $\mathbf{W}(k; T)$  defined in (18), where  $k \in \{0, 1, 2, \dots\}$  is the iteration counter. As mentioned before, this is equivalent to performing  $\mathcal{O}(T)$  decentralized communication rounds at each iteration. Choosing the number of consensus steps  $T = \lceil \chi \ln 2 \rceil$  together with (19) implies

$$\|\mathbf{W}(k; T)x - x\|^2 \leq \frac{1}{2}\|x\|^2 \text{ for all } x \in \mathcal{L}^\perp. \quad (20)$$

This means that  $\mathbf{W}(k; T)$  satisfies (3) with  $\chi$  replaced by  $\frac{1}{2}$  and hence both ADOM and ADOM+ with multi-consensus require  $\mathcal{O}\left(\sqrt{L/\mu}\log\frac{1}{\epsilon}\right)$  iterations to obtain an  $\epsilon$ -accurate solution. Taking into account that these algorithms still perform  $\mathcal{O}(1)$  local computations and  $\mathcal{O}(T) = \mathcal{O}(\chi)$  decentralized communication rounds at each iteration, we arrive at the following theorems.

**Theorem 5.** *Let the functions  $f_1, \dots, f_n$  be  $L$ -smooth and  $\mu$ -strongly convex and let the Assumption 1 hold. Then, ADOM with multi-consensus requires  $\mathcal{O}\left(\sqrt{L/\mu}\log\frac{1}{\epsilon}\right)$  local computation rounds and  $\mathcal{O}\left(\chi\sqrt{L/\mu}\log\frac{1}{\epsilon}\right)$  decentralized communication rounds to find an  $\epsilon$ -accurate solution of the distributed optimization problem (1).*

**Theorem 6.** *Let the functions  $f_1, \dots, f_n$  be  $L$ -smooth and  $\mu$ -strongly convex and let the Assumption 1 hold. Then, ADOM+ with multi-consensus requires  $\mathcal{O}\left(\sqrt{L/\mu}\log\frac{1}{\epsilon}\right)$  local computation rounds and  $\mathcal{O}\left(\chi\sqrt{L/\mu}\log\frac{1}{\epsilon}\right)$  decentralized communication rounds to find an  $\epsilon$ -accurate solution of the distributed optimization problem (1).*

### 5.3 Comparison with Acc-GT (Li and Lin, 2021)

To the best of our knowledge ADOM with multi-consensus is the first dual based optimal decentralized algorithm for time-varying networks. In the case when the primal oracle is assumed, besides ADOM+ with multi-consensus, there is only one previously existing algorithm, Acc-GT with multi-consensus (Li and Lin, 2021), which achieves optimal local computation and decentralized communication complexities. However, in the case when multi-consensus is not used, its iteration complexity is  $\mathcal{O}\left(\chi^{3/2}\sqrt{L/\mu}\log\frac{1}{\epsilon}\right)$ , which is *worse* than the complexity of ADOM+, by the factor  $\chi^{1/2}$ . Since communication is known to be the main bottleneck in distributed training systems, multi-consensus is unlikely to be used in practice, which may limit the practical performance of Acc-GT in comparison to ADOM+.

## 6 Experiments

In this section we perform an illustrative experiment with logistic regression. We take 10,000 samples from the covtype LIBSVM<sup>6</sup> dataset and distribute them across  $n = 100$  nodes of a network, 100 samples per node. We use two types of networks: a sequence of random geometric graphs with  $\chi \approx 30$ , and a sequence which alternates between the ring and star topology, with  $\chi \approx 1,000$ . We choose the regularization parameter  $\mu$  such that the condition number becomes  $\kappa = 10^5$ . We compare ADOM+ with multi-consensus with two state-of-the-art decentralized algorithms for time-varying networks: Acc-GT with multi-consensus (Li and Lin, 2021), and a variant of APM-C for time-varying networks (Rogozin et al., 2020; Li et al., 2018). We set all parameters of Acc-GT and APM-C to those used in the experimental sections of the corresponding papers, and tune the parameters of ADOM+. The results are presented in Figure 2. We see that ADOM+ has similar empirical behavior to the recently proposed Acc-GT method. Both these methods are better than APM-C in terms of the number of decentralized communication rounds (this is expected, since this method has sublinear communication complexity), and worse in terms of the number of gradient calls. We provide more details and additional experiments in the appendix.

## Acknowledgments

The work of D. Kovalev, E. Gasanov and P. Richtárik was supported by the KAUST Baseline Research Funding Scheme. The work of A. Gasnikov was supported by the Russian Science Foundation (project 21-71-30005), a grant for research centers in the field of artificial intelligence, provided by the Analytical Center for the Government of the Russian Federation in accordance with the subsidy agreement (agreement identifier 000000D730321P5Q0002) and the agreement with the Ivannikov Institute for System Programming of the Russian Academy of Sciences dated November 2, 2021 No. 70-2021-00142.

## References

- Bazerque, J. A. and Giannakis, G. B. (2009). Distributed spectrum sensing for cognitive radio networks by exploiting sparsity. *IEEE Transactions on Signal Processing*, 58(3):1847–1862.
- Beck, A., Nedić, A., Ozdaglar, A., and Teboulle, M. (2014). An  $o(1/k)$  gradient method for network resource allocation problems. *IEEE Transactions on Control of Network Systems*, 1(1):64–73.
- Chang, C.-C. and Lin, C.-J. (2011). Libsvm: a library for support vector machines. *ACM transactions on intelligent systems and technology (TIST)*, 2(3):1–27.
- Condat, L., Kitahara, D., Contreras, A., and Hirabayashi, A. (2019). Proximal splitting algorithms: A tour of recent advances, with new twists. *arXiv preprint arXiv:1912.00137*.
- Dvinskikh, D. and Gasnikov, A. (2019). Decentralized and parallelized primal and dual accelerated methods for stochastic convex programming problems. *arXiv preprint arXiv:1904.09015*.
- Gan, L., Topcu, U., and Low, S. H. (2012). Optimal decentralized protocol for electric vehicle charging. *IEEE Transactions on Power Systems*, 28(2):940–951.
- Giselsson, P., Doan, M. D., Keviczky, T., De Schutter, B., and Rantzer, A. (2013). Accelerated gradient methods and dual decomposition in distributed model predictive control. *Automatica*, 49(3):829–833.
- Gorbunov, E., Kovalev, D., Makarenko, D., and Richtárik, P. (2020). Linearly converging error compensated SGD. In *Neural Information Processing Systems*.
- Karimireddy, S. P., Rebjock, Q., Stich, S., and Jaggi, M. (2019). Error feedback fixes SignSGD and other gradient compression schemes. In *International Conference on Machine Learning*, pages 3252–3261. PMLR.

---

<sup>6</sup>The LIBSVM (Chang and Lin, 2011) dataset collection is available at <https://www.csie.ntu.edu.tw/~cjlin/libsvmtools/datasets/>

- Kolar, M., Song, L., Ahmed, A., Xing, E. P., et al. (2010). Estimating time-varying networks. *Annals of Applied Statistics*, 4(1):94–123.
- Konečný, J., McMahan, H. B., Yu, F. X., Richtárik, P., Suresh, A. T., and Bacon, D. (2016). Federated learning: Strategies for improving communication efficiency. *arXiv preprint arXiv:1610.05492*.
- Kovalev, D., Salim, A., and Richtárik, P. (2020). Optimal and practical algorithms for smooth and strongly convex decentralized optimization. *Advances in Neural Information Processing Systems*, 33.
- Kovalev, D., Shulgin, E., Richtárik, P., Rogozin, A., and Gasnikov, A. (2021). ADOM: Accelerated decentralized optimization method for time-varying networks. *arXiv preprint arXiv:2102.09234*.
- Li, H., Fang, C., Yin, W., and Lin, Z. (2018). A sharp convergence rate analysis for distributed accelerated gradient methods. *arXiv preprint arXiv:1810.01053*.
- Li, H. and Lin, Z. (2021). Accelerated gradient tracking over time-varying graphs for decentralized optimization. *arXiv preprint arXiv:2104.02596*.
- Li, T., Sahu, A. K., Talwalkar, A., and Smith, V. (2020). Federated learning: Challenges, methods, and future directions. *IEEE Signal Processing Magazine*, 37(3):50–60.
- Maros, M. and Jaldén, J. (2018). Panda: A dual linearly converging method for distributed optimization over time-varying undirected graphs. In *2018 IEEE Conference on Decision and Control (CDC)*, pages 6520–6525. IEEE.
- McMahan, B., Moore, E., Ramage, D., Hampson, S., and y Arcas, B. A. (2017). Communication-efficient learning of deep networks from decentralized data. In *Artificial Intelligence and Statistics*, pages 1273–1282. PMLR.
- Nedic, A., Olshevsky, A., and Shi, W. (2017). Achieving geometric convergence for distributed optimization over time-varying graphs. *SIAM Journal on Optimization*, 27(4):2597–2633.
- Nesterov, Y. (2003). *Introductory lectures on convex optimization: A basic course*, volume 87. Springer Science & Business Media.
- Pu, S., Shi, W., Xu, J., and Nedic, A. (2020). Push-pull gradient methods for distributed optimization in networks. *IEEE Transactions on Automatic Control*.
- Qu, G. and Li, N. (2019). Accelerated distributed nesterov gradient descent. *IEEE Transactions on Automatic Control*, 65(6):2566–2581.
- Rabbat, M. and Nowak, R. (2004). Distributed optimization in sensor networks. In *Proceedings of the 3rd International Symposium on Information Processing in Sensor Networks*, pages 20–27.
- Rockafellar, R. T. (2015). *Convex analysis*. Princeton university press.
- Rogozin, A., Lukoshkin, V., Gasnikov, A., Kovalev, D., and Shulgin, E. (2020). Towards accelerated rates for distributed optimization over time-varying networks. *arXiv preprint arXiv:2009.11069*.
- Salim, A., Condat, L., Kovalev, D., and Richtárik, P. (2021). An optimal algorithm for strongly convex minimization under affine constraints. *arXiv preprint arXiv:2102.11079*.
- Salim, A., Condat, L., Mishchenko, K., and Richtárik, P. (2020). Dualize, split, randomize: fast nonsmooth optimization algorithms. *arXiv preprint arXiv:2004.02635*.
- Scaman, K., Bach, F., Bubeck, S., Lee, Y. T., and Massoulié, L. (2017). Optimal algorithms for smooth and strongly convex distributed optimization in networks. In *international conference on machine learning*, pages 3027–3036. PMLR.
- Stich, S. U. and Karimireddy, S. P. (2019). The error-feedback framework: Better rates for SGD with delayed gradients and compressed communication. *arXiv preprint arXiv:1909.05350*.
- Ye, H., Luo, L., Zhou, Z., and Zhang, T. (2020). Multi-consensus decentralized accelerated gradient descent. *arXiv preprint arXiv:2005.00797*.
- Zadeh, L. A. (1961). Time-varying networks, i. *Proceedings of the IRE*, 49(10):1488–1503.

# Appendix: Lower Bounds and Optimal Algorithms...

## Contents

|          |                                                                   |           |
|----------|-------------------------------------------------------------------|-----------|
| <b>1</b> | <b>Introduction</b>                                               | <b>1</b>  |
| 1.1      | Time-varying Networks . . . . .                                   | 2         |
| 1.2      | Contributions . . . . .                                           | 2         |
| <b>2</b> | <b>Notation and Assumptions</b>                                   | <b>3</b>  |
| 2.1      | Smooth and Strongly Convex Regime . . . . .                       | 3         |
| 2.2      | Primal and Dual Oracle . . . . .                                  | 3         |
| 2.3      | Decentralized Communication . . . . .                             | 3         |
| 2.4      | Gossip Matrices . . . . .                                         | 4         |
| <b>3</b> | <b>Lower Complexity Bounds</b>                                    | <b>4</b>  |
| 3.1      | First-order Decentralized Algorithms . . . . .                    | 4         |
| 3.2      | Main Theorems . . . . .                                           | 5         |
| <b>4</b> | <b>Primal Algorithm with Optimal Communication Complexity</b>     | <b>6</b>  |
| 4.1      | Reformulation via Lifting . . . . .                               | 6         |
| 4.2      | Saddle Point Reformulation . . . . .                              | 6         |
| 4.3      | Monotone Inclusion Reformulation . . . . .                        | 7         |
| 4.4      | Primal Algorithm Design and Convergence . . . . .                 | 7         |
| <b>5</b> | <b>Optimal Algorithms</b>                                         | <b>8</b>  |
| 5.1      | Multi-consensus Procedure . . . . .                               | 8         |
| 5.2      | Optimal Algorithms: ADOM and ADOM+ with multi-consensus . . . . . | 8         |
| 5.3      | Comparison with Acc-GT (Li and Lin, 2021) . . . . .               | 9         |
| <b>6</b> | <b>Experiments</b>                                                | <b>10</b> |
| <b>A</b> | <b>Mixing and Gossip Matrices</b>                                 | <b>13</b> |
| A.1      | Lower Bounds . . . . .                                            | 13        |
| A.2      | Optimal Algorithms . . . . .                                      | 14        |
| <b>B</b> | <b>Experimental Details and Additional Experiments</b>            | <b>15</b> |
| B.1      | Experimental Details . . . . .                                    | 15        |
| B.2      | Further experiments . . . . .                                     | 15        |
| <b>C</b> | <b>Proof of Theorem 1</b>                                         | <b>18</b> |
| <b>D</b> | <b>Proof of Theorem 4</b>                                         | <b>21</b> |

## A Mixing and Gossip Matrices

In the literature on distributed optimization over time-varying networks mixing matrices are typically used to represent decentralized communication (Nedic et al., 2017). For each communication round  $q \in \{0, 1, 2, \dots\}$ , consider a matrix  $\mathbf{M}(q) \in \mathbb{R}^{n \times n}$  satisfying the following assumption.

**Assumption 2.** For any  $q \in \{0, 1, 2, \dots\}$  matrix  $\mathbf{M}(q) \in \mathbb{R}^{n \times n}$  satisfies the following relations:

1.  $\mathbf{M}(q)_{i,j} = 0$  if  $i \neq j$  and  $(i, j) \notin \mathcal{E}^q$ ,
2.  $\mathbf{M}(q)\mathbf{1}_n = \mathbf{1}_n$  and  $\mathbf{1}_n^\top \mathbf{M}(q) = \mathbf{1}_n^\top$ ,
3. There exists  $B \in \{1, 2, \dots\}$  and  $\chi \geq 1$  such that

$$\sigma_{\max}^2 \left( \mathbf{M}_B(q) - \frac{1}{n} \mathbf{1}_n \mathbf{1}_n^\top \right) \leq (1 - \chi^{-1}),$$

where  $\sigma_{\max}(\cdot)$  denotes the largest singular value of a matrix and  $\mathbf{M}_B(q)$  is defined as

$$\mathbf{M}_B(q) = \prod_{q'=q}^{q+B-1} \mathbf{M}(q').$$

We will refer to the matrix  $\mathbf{M}(q)$  as the *mixing matrix*. A typical example of the matrices  $\mathbf{M}(q)$  is the Metropolis weight matrices for the sequence of  $B$ -connected graphs (Nedic et al., 2017).

Let us identify the difference between Assumption 2 on the mixing matrices  $\mathbf{M}(q)$  and Assumption 1 on the gossip matrices. In order to do that define  $\mathbf{W}(q) = \mathbf{I}_n - \mathbf{M}(q)$ . In this case one can show that the matrices  $\mathbf{M}(q)$  satisfy Assumption 2 if and only if the matrices  $\mathbf{W}(q)$  satisfy Assumption 3, which is given as follow.

**Assumption 3.** For any  $q \in \{0, 1, 2, \dots\}$  matrix  $\mathbf{W}(q) \in \mathbb{R}^{n \times n}$  satisfies the following relations:

1.  $\mathbf{W}(q)_{i,j} = 0$  if  $i \neq j$  and  $(i, j) \notin \mathcal{E}^q$ ,
2.  $\ker \mathbf{W}(q) \supset \{(x_1, \dots, x_n) \in \mathbb{R}^n : x_1 = \dots = x_n\}$ ,
3.  $\text{range} \mathbf{W}(q) \subset \{(x_1, \dots, x_n) \in \mathbb{R}^n : \sum_{i=1}^n x_i = 0\}$ ,
4. There exists  $B \in \{1, 2, \dots\}$  and  $\chi \geq 1$  such that

$$\|\mathbf{W}_B(q)x - x\|^2 \leq (1 - \chi^{-1})\|x\|^2 \text{ for all } x \in \{(x_1, \dots, x_n) \in \mathbb{R}^n : \sum_{i=1}^n x_i = 0\},$$

where  $\mathbf{W}_B(q)$  is defined as

$$\mathbf{W}_B(q) = \mathbf{I}_n - \prod_{q'=q}^{q+B-1} (\mathbf{I}_n - \mathbf{W}(q')).$$

Note that when  $B = 1$ , Assumption 3 coincides with Assumption 1. However, it turns out that our main results, including the lower bounds and optimal algorithms, can be easily extended to the general case  $B > 1$ .

### A.1 Lower Bounds

In this section we present Theorem 7, which establishes the lower bound on the number of decentralized communication rounds that are necessary to find an approximate solution of the problem (1) under Assumption 3. This is a generalized version of Theorem 2 for the case  $B > 1$ .

**Theorem 7.** For any  $\chi \geq 3$ ,  $L > \mu \geq 0$  there exists a sequence of graphs  $\{\mathcal{G}^q\}_{q=0}^\infty$ , a corresponding sequence of gossip matrices  $\{\hat{\mathbf{W}}(q)\}_{q=0}^\infty \subset \mathbb{R}^{n \times n}$  satisfying the Assumption 3, and  $\mu$ -strongly convex and  $L$ -smooth functions  $f_i : \ell_2 \rightarrow \mathbb{R}, i \in \mathcal{V}$ , such that for any first order decentralized algorithm, the number of decentralized communication rounds to find an  $\epsilon$ -accurate solution of the problem (1) is lower bounded by

$$\Omega \left( B\chi \sqrt{L/\mu} \log \frac{1}{\epsilon} \right). \quad (21)$$

The proof is a trivial extension of the proof of Theorem 2. In particular, the only difference is that we use the sequence of the gossip matrices  $\hat{\mathbf{W}}(q)$  which is given as

$$\hat{\mathbf{W}}(q) = \begin{cases} \mathbf{W}(q/B) & q \bmod B = 0 \\ 0 & q \bmod B \neq 0 \end{cases}, \quad (22)$$

where  $\mathbf{W}(q)$  is the sequence of gossip matrices given by Theorem 2. Clearly, the matrices  $\hat{\mathbf{W}}(q)$  satisfy Assumption 3. Such choice of the matrices  $\hat{\mathbf{W}}(q)$  implies that nodes communicate only once per  $B$  communication rounds. Hence, the lower complexity bound (21) given by Theorem 7 is  $B$  times larger than the bound (5) given by Theorem 2.

## A.2 Optimal Algorithms

In this section we show how to develop optimal decentralized optimization algorithms for time-varying networks under the Assumption 3. It is done using the multi-consensus procedure similarly to Section 5. Indeed, let the matrices  $\mathbf{W}(q)$  satisfy Assumption 3 and recall the matrix  $\mathbf{W}(k; T)$  defined in (18). One can observe, that the matrices  $\mathbf{W}(k; T)$ ,  $k = 0, 1, 2, \dots$ , with  $T = B$  satisfy our standard Assumption 1. Following Section 5.2 we choose  $T = B \lceil \chi \ln 2 \rceil$  which implies (20). Hence, both ADOM and ADOM+ with  $T = B \lceil \chi \ln 2 \rceil$  steps of multi-consensus achieve the iteration complexity  $\mathcal{O}\left(\sqrt{L/\mu} \log \frac{1}{\epsilon}\right)$ , which leads to the following theorems.

**Theorem 8.** *Let the functions  $f_1, \dots, f_n$  be  $L$ -smooth and  $\mu$ -strongly convex and let the Assumption 3 hold. Then, ADOM with multi-consensus requires  $\mathcal{O}\left(\sqrt{L/\mu} \log \frac{1}{\epsilon}\right)$  local computation rounds and  $\mathcal{O}\left(B\chi\sqrt{L/\mu} \log \frac{1}{\epsilon}\right)$  decentralized communication rounds to find an  $\epsilon$ -accurate solution of the distributed optimization problem (1).*

**Theorem 9.** *Let the functions  $f_1, \dots, f_n$  be  $L$ -smooth and  $\mu$ -strongly convex and let the Assumption 3 hold. Then, ADOM+ with multi-consensus requires  $\mathcal{O}\left(\sqrt{L/\mu} \log \frac{1}{\epsilon}\right)$  local computation rounds and  $\mathcal{O}\left(B\chi\sqrt{L/\mu} \log \frac{1}{\epsilon}\right)$  decentralized communication rounds to find an  $\epsilon$ -accurate solution of the distributed optimization problem (1).*

## B Experimental Details and Additional Experiments

### B.1 Experimental Details

We perform experiments with logistic regression for binary classification with  $\ell_2$  regularization. That is, our loss function has the form

$$f_i(x) = \frac{1}{m} \sum_{j=1}^m \log(1 + \exp(-b_{ij} a_{ij}^\top x)) + \frac{r}{2} \|x\|^2, \quad (23)$$

where  $a_{ij} \in \mathbb{R}^d$  and  $b_{ij} \in \{-1, +1\}$  are data points and labels,  $r > 0$  is a regularization parameter, and  $m$  is the number of data points stored on each node. In this section we generate synthetic datasets with `sklearn.datasets.make_classification` function from scikit-learn library. We generate a number of datasets consisting of 10,000 samples, distributed across  $n = 100$  nodes of the network,  $m = 100$  samples per each node. We vary the parameter  $r$  to obtain different values of the condition number  $\kappa$ .

### B.2 Further experiments

Here we simulate time-varying networks with a sequence of randomly generated geometric graphs. Geometric graphs are constructed by generating  $n = 100$  nodes from the uniform distribution over  $[0, 1]^2 \subset \mathbb{R}^2$ , and connecting each pair of nodes whose distance is less than a certain *radius*. We enforce connectivity by adding a small number of edges. We obtain a sequence of graphs  $\{\mathcal{G}^q\}_{q=0}^\infty$  by generating a set of 50 random geometric graphs, and alternating between them in a cyclic manner. We choose  $\mathbf{W}(q)$  to be the Laplacian matrix of the graphs  $\mathcal{G}^q$  divided by its largest eigenvalue. We vary the condition number  $\chi$  by choosing different values of the radius parameter.

We compare ADOM+ with state-of-the art primal decentralized algorithms for time-varying networks: Acc-GT (Li and Lin, 2021) and a variant of APM-C (Rogozin et al., 2020; Li et al., 2018). We do not perform experiments with ADOM, because it is a dual based algorithm, and because its empirical behavior was studied in (Kovalev et al., 2021).

For each condition number of the problem  $\kappa \in \{10, 10^2, 10^3, 10^4\}$ , and condition number of the time-varying network  $\chi \in \{3, 8, 37, 223, 2704, 4628\}$ , we perform a comparison of these algorithms. Figures 3 and 4 show the convergence of the algorithms in the number of decentralized communications and the number of local computations, for all chosen values of  $\kappa$  and  $\chi$ , respectively.

Overall, the results are similar to what was obtained in Section 6. We observe that ADOM+ and Acc-GT have similar behavior, which is expected since they are both optimal. Both of them perform better than APM-C in terms of the number of decentralized communication rounds, which is expected since APM-C has a sublinear communication complexity only. However, APM-C performs better in terms of the number of local computations. Indeed, while all three algorithms are optimal in local computation complexity, APM-C has better constants.

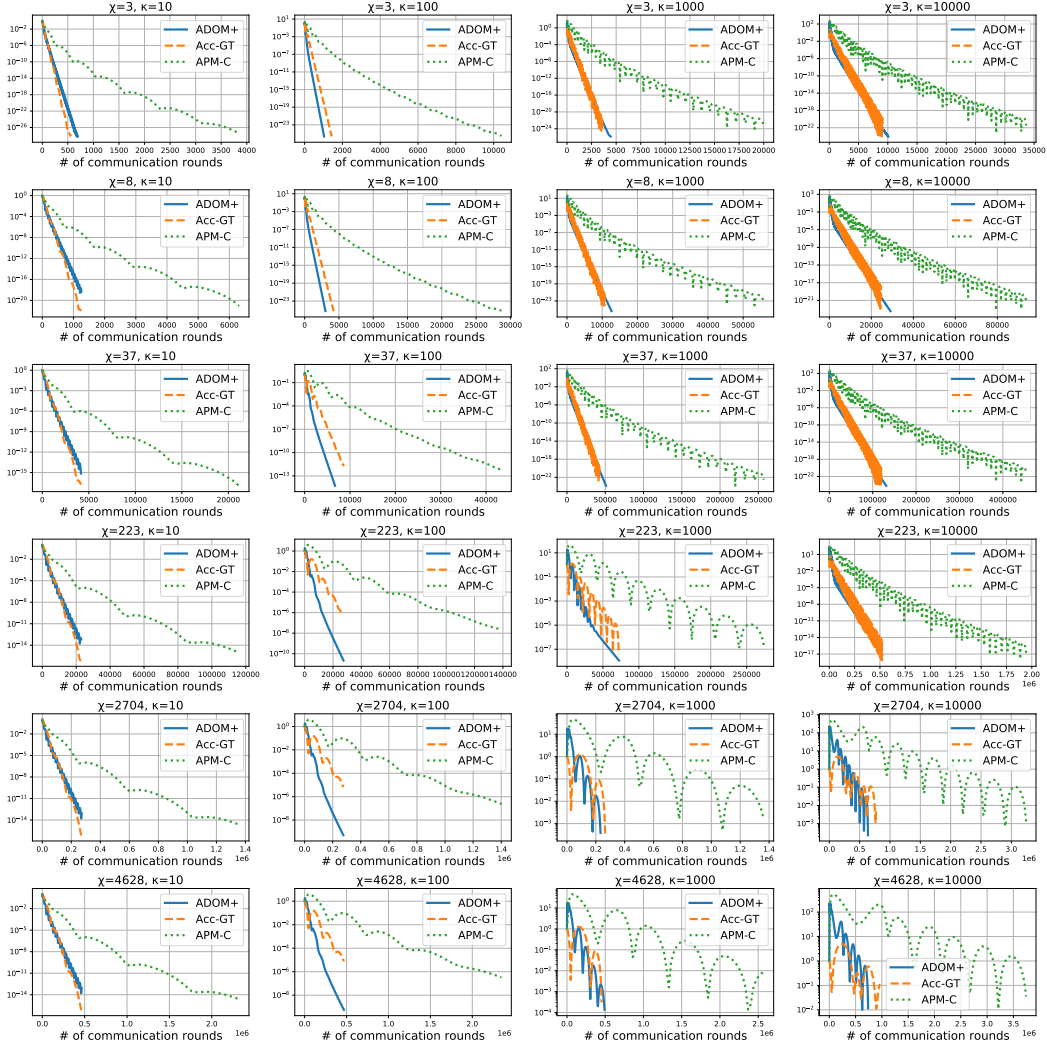

Figure 3: Comparison of our method ADOM+ and the baselines Acc-GT and APM-C in **decentralized communication complexity** on problems with  $\kappa \in \{10, 10^2, 10^3, 10^4\}$  and time-varying networks with  $\chi \in \{3, 8, 37, 223, 2704, 4628\}$ .



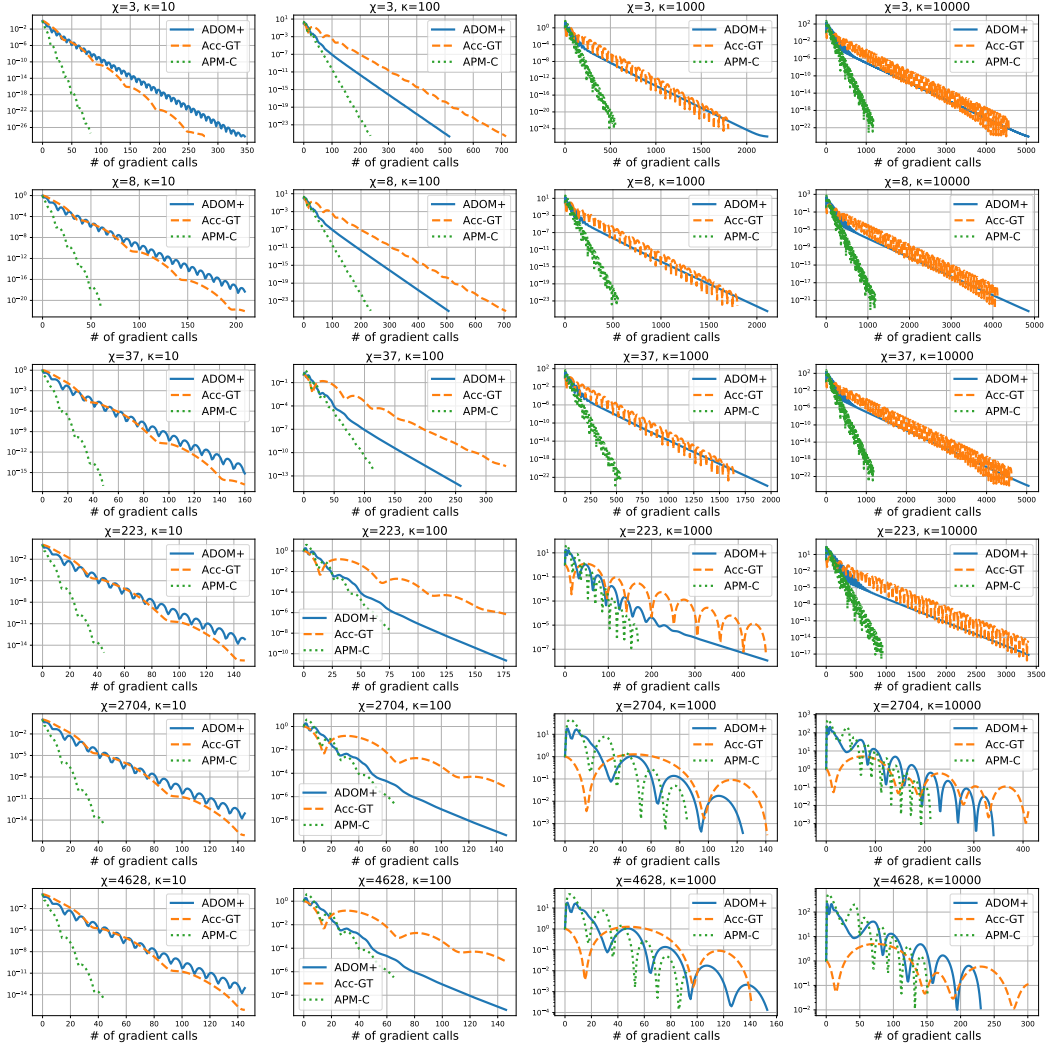

Figure 4: Comparison of our method ADOM+ and the baselines Acc-GT and APM-C in **local computation complexity** on problems with  $\kappa \in \{10, 10^2, 10^3, 10^4\}$  and time-varying networks with  $\chi \in \{3, 8, 37, 223, 2704, 4628\}$ .

## C Proof of Theorem 1

*Proof.* We choose number of nodes  $n = 3\lfloor \chi/3 \rfloor$ . Hence  $n \geq 3$  and  $n \bmod 3 = 0$ . Now, we divide the set of nodes  $\mathcal{V} = \{1, \dots, n\}$  into three disjoint sets  $\mathcal{V} = \mathcal{V}_1 \cup \mathcal{V}_2 \cup \mathcal{V}_3$ :  $\mathcal{V}_1 = \{1, \dots, n/3\}$ ,  $\mathcal{V}_2 = \{n/3 + 1, \dots, 2n/3\}$ ,  $\mathcal{V}_3 = \{2n/3 + 1, \dots, n\}$ . Note, that  $|\mathcal{V}_1| = |\mathcal{V}_2| = |\mathcal{V}_3| = n/3$ .

We define  $\mathcal{G}^q$  to be a star graph centered at the node  $i_c(q) = |\mathcal{V}_1| + 1 + (q \bmod |\mathcal{V}_2|)$ . Note, that  $i_c(q) \in \mathcal{V}_2$  for all  $q \in \{0, 1, 2, \dots\}$ . We define  $\mathbf{W}(q)$  as the Laplacian matrix of the graph  $\mathcal{G}(q)$ . Hence,  $\lambda_{\max}(\mathbf{W}(q))/\lambda_{\min}^+(\mathbf{W}(q)) = n \leq \chi$  and  $\mathbf{W}(q)$  satisfies condition (3).

We define functions  $f_i$  in the following way:

$$f_i(x) = \begin{cases} \frac{\mu}{2}\|x\|^2 + \frac{L-\mu}{4} [(x_{[1]} - 1)^2 + \sum_{l=1}^{\infty} (x_{[2l]} - x_{[2l+1]})^2], & i \in \mathcal{V}_1 \\ \frac{\mu}{2}\|x\|^2, & i \in \mathcal{V}_2. \\ \frac{\mu}{2}\|x\|^2 + \frac{L-\mu}{4} \sum_{l=1}^{\infty} (x_{[2l-1]} - x_{[2l]})^2, & i \in \mathcal{V}_3 \end{cases} \quad (24)$$

The following lemma gives the solution of problem (1) with such a choice of  $f_i$ .

**Lemma 1.** *Problem (1) with  $f_i$  given by (24) has a unique solution  $x^* = (\rho^l)_{l=1}^{\infty} \in \ell_2$ , where  $\rho$  is given by*

$$\rho = \frac{\sqrt{\frac{2L}{3\mu} + \frac{1}{3}} - 1}{\sqrt{\frac{2L}{3\mu} + \frac{1}{3}} + 1}. \quad (25)$$

Consider the following quantity:

$$s_i(k) = \begin{cases} 0, & \mathcal{H}_i(k) \subseteq \{0\}, \\ \min\{s \in \{1, 2, \dots\} : \mathcal{H}_i(k) \subset \text{Span}(\{e_1, e_2, \dots, e_s\})\}, & \text{otherwise} \end{cases}, \quad (26)$$

where  $e_s$  is the  $s$ -th unit basis vector. Using assumptions on the algorithm from Section 3.1 we can make some conclusions about update of  $s_i(k)$ . In particular, if at time step  $k$  algorithm performs a local computation round, then using the fact, that  $f_i(x)$  is a quadratic function with a certain block structure (and  $f^*(x)$  has the same block structure), one can observe that

$$s_i(k+1) \leq s_i(k) + \begin{cases} 1 - (s_i(k) \bmod 2), & i \in \mathcal{V}_1 \\ 0, & i \in \mathcal{V}_2. \\ (s_i(k) \bmod 2), & i \in \mathcal{V}_3 \end{cases} \quad (27)$$

Similarly, if at time step  $k$  communication round number  $q$  was performed, then using the structure of  $\mathcal{G}^q$  one can observe that

$$s_i(k+1) \leq \begin{cases} \max\{s_i(k), s_{i_c(q)}(k)\}, & i \neq i_c(q) \\ \max\{s_j(k) : j \in \mathcal{V}\}, & i = i_c(q) \end{cases}. \quad (28)$$

The next key lemma shows that  $s_i(k)$  is bounded compared to the number of communication rounds.

**Lemma 2.** *Let  $k \in \{0, 1, \dots, k_q\}$  be any time step, where  $k_q$  is a time step at which the algorithm performed communication round number  $q \in \{0, 1, 2, \dots\}$ . Then the following statement is true:*

$$s_i(k) \leq 2\lfloor q/|\mathcal{V}_2| \rfloor + \begin{cases} 0, & i \in \mathcal{V}_3 \cup \{i_c(q), i_c(q) + 1, \dots, |\mathcal{V}_1| + |\mathcal{V}_2|\} \\ 1, & \text{otherwise} \end{cases}. \quad (29)$$

Lemma 2 implies

$$s_i(k) \leq \frac{2q}{|\mathcal{V}_2|} + 1 = \frac{6q}{n} + 1 = \frac{2q}{\lfloor \chi/3 \rfloor} + 1 \leq \frac{12q}{\chi} + 1.$$

Hence, using Lemma (1) we can lower bound  $\|x_i^o(k) - x^*\|^2$ :

$$\|x_i^o(k) - x^*\|^2 = \sum_{l=1}^{\infty} (x_i^o(k) - x^*)_{[l]}^2 \geq \sum_{l=s_i(k)+1}^{\infty} (x_i^o(k) - x^*)_{[l]}^2$$

$$\begin{aligned}
&= \sum_{l=s_i(k)+1}^{\infty} \rho^{2l} = \rho^{2s_i(k)+2} \sum_{l=0}^{\infty} \rho^{2l} = \frac{\rho^{2s_i(k)+2}}{1-\rho^2} \\
&\geq \frac{\rho^{24q/\chi+4}}{1-\rho^2} \geq C\rho^{24q/\chi},
\end{aligned}$$

where  $C = \frac{\rho^4}{1-\rho^2}$ . Note, that  $\rho \geq \max\left\{0, 1 - \frac{\sqrt{6\mu}}{\sqrt{L}}\right\}$  and hence

$$\|x_i^o(k) - x^*\|^2 \geq C \left( \max\left\{0, 1 - \frac{\sqrt{6\mu}}{\sqrt{L}}\right\} \right)^{24q/\chi}.$$

Finally, using Bernoulli inequality we get

$$\|x_i^o(k) - x^*\|^2 \geq C \left( \max\left\{0, 1 - \frac{24\sqrt{6\mu}}{\sqrt{L}}\right\} \right)^{q/\chi}.$$

□

*Proof of Lemma 1.*

$$\begin{aligned}
\sum_{i \in \mathcal{V}} f_i(x) &= \frac{n\mu}{2} \|x\|^2 + \frac{n(L-\mu)}{12} \left[ (x_{[1]} - 1)^2 + \sum_{l=1}^{\infty} (x_{[l]} - x_{[l+1]})^2 \right] \\
&= \frac{n\mu}{2} \|x\|^2 + \frac{n(L-\mu)}{12} \left[ x_{[1]}^2 - 2x_{[1]} + 1 + \sum_{l=1}^{\infty} (x_{[l]}^2 - 2x_{[l]}x_{[l+1]} + x_{[l+1]}^2) \right] \\
&= \frac{n\mu}{2} \|x\|^2 + \frac{n(L-\mu)}{12} \left[ \sum_{l=1}^{\infty} (2x_{[l]}^2 - 2x_{[l]}x_{[l+1]}) - 2x_{[1]} + 1 \right] \\
&= \frac{n(L-\mu)}{12} \left[ \sum_{l=1}^{\infty} \left( \left(2 + \frac{6\mu}{L-\mu}\right) x_{[l]}^2 - 2x_{[l]}x_{[l+1]} \right) - 2x_{[1]} + 1 \right] \\
&= \frac{n(L-\mu)}{12} \left[ \sum_{l=1}^{\infty} \left( \frac{2(L+2\mu)}{L-\mu} x_{[l]}^2 - 2x_{[l]}x_{[l+1]} \right) - 2x_{[1]} + 1 \right].
\end{aligned}$$

Next, we use the fact that  $\frac{2(L+2\mu)}{L-\mu} = \rho + \frac{1}{\rho}$  with  $\rho$  given by (25) and get

$$\begin{aligned}
\sum_{i \in \mathcal{V}} f_i(x) &= \frac{n(L-\mu)}{12} \left[ \sum_{l=1}^{\infty} \left( \rho x_{[l]}^2 + \frac{1}{\rho} x_{[l]}^2 - 2x_{[l]}x_{[l+1]} \right) - 2x_{[1]} + 1 \right] \\
&= \frac{n(L-\mu)}{12\rho} \left[ \sum_{l=1}^{\infty} \left( \rho^2 x_{[l]}^2 + x_{[l]}^2 - 2\rho x_{[l]}x_{[l+1]} \right) - 2\rho x_{[1]} + \rho \right] \\
&= \frac{n(L-\mu)}{12\rho} \left[ \sum_{l=1}^{\infty} \left( \rho^2 x_{[l]}^2 - 2\rho x_{[l]}x_{[l+1]} + x_{[l+1]}^2 \right) + x_{[1]}^2 - 2\rho x_{[1]} + \rho \right] \\
&= \frac{n(L-\mu)}{12\rho} \left[ \sum_{l=1}^{\infty} (\rho x_{[l]} - x_{[l+1]})^2 + (x_{[1]} - \rho)^2 + \rho - \rho^2 \right].
\end{aligned}$$

Now it's clear that  $\sum_{i \in \mathcal{V}} f_i(x) \geq \frac{n(L-\mu)(1-\rho)}{12}$  and  $\sum_{i \in \mathcal{V}} f_i(x) = \frac{n(L-\mu)(1-\rho)}{12}$  if and only if  $x = x^*$ . Hence,  $x^*$  is indeed a unique solution to the problem (1). □

*Proof of Lemma 2.* We prove this by induction in  $q$ .

**Induction basis.** When  $q = 0$  and  $k \in \{0, 1, \dots, k_0\}$  (meaning no communication rounds were done), from (27) we can conclude, that

$$s_i(k) \leq \begin{cases} 1, & i \in \mathcal{V}_1 \\ 0, & i \in \mathcal{V}_2 \cup \mathcal{V}_3 \end{cases},$$

which is (29) in case  $q = 0$ .

**Induction step.** Now, we assume that (29) holds for  $q$  and  $k \in \{0, 1, \dots, k_q\}$  and prove it for  $q + 1$  and  $k \in \{0, 1, \dots, k_{q+1}\}$ . Indeed, consider time step  $k_q$  at which communication round  $q$  is performed. Consider two possible cases:

1.  $i_c(q) \neq |\mathcal{V}_1| + |\mathcal{V}_2|$ .

In this case  $\lfloor (q+1)/\mathcal{V}_2 \rfloor = \lfloor q/\mathcal{V}_2 \rfloor$  and  $i_c(q+1) = i_c(q) + 1$ . Since (29) holds for  $q$  and  $k_q$ , using (28) we get  $s_{i_c(q)}(k_q) \leq 2\lfloor q/\mathcal{V}_2 \rfloor$  and  $s_{i_c(q)}(k_q + 1) \leq 2\lfloor q/\mathcal{V}_2 \rfloor + 1$ . Hence, using (28) we get for all  $i \in \mathcal{V}$

$$\begin{aligned} s_i(k) &\leq 2\lfloor q/|\mathcal{V}_2| \rfloor + \begin{cases} 0, & i \in \mathcal{V}_3 \cup \{i_c(q) + 1, \dots, |\mathcal{V}_1| + |\mathcal{V}_2|\} \\ 1, & \text{otherwise} \end{cases} \\ &= 2\lfloor (q+1)/|\mathcal{V}_2| \rfloor + \begin{cases} 0, & i \in \mathcal{V}_3 \cup \{i_c(q) + 1, \dots, |\mathcal{V}_1| + |\mathcal{V}_2|\} \\ 1, & \text{otherwise} \end{cases}, \end{aligned}$$

which is (29) for  $q + 1$  and  $k = k_q + 1$ .

2.  $i_c(q) = |\mathcal{V}_1| + |\mathcal{V}_2|$ .

In this case  $\lfloor (q+1)/\mathcal{V}_2 \rfloor = \lfloor q/\mathcal{V}_2 \rfloor + 1$  and  $i_c(q+1) = |\mathcal{V}_1| + 1$ . Since (29) holds for  $q$  and  $k_q$ , we have an upper bound  $s_i(k_q) \leq 2\lfloor q/\mathcal{V}_2 \rfloor + 1$  and (28) implies

$$\begin{aligned} s_i(k_q + 1) &\leq 2\lfloor q/\mathcal{V}_2 \rfloor + 1 \leq 2(\lfloor q/\mathcal{V}_2 \rfloor + 1) = 2\lfloor (q+1)/\mathcal{V}_2 \rfloor \\ &\leq 2\lfloor (q+1)/|\mathcal{V}_2| \rfloor + \begin{cases} 0, & i \in \mathcal{V}_3 \cup \{i_c(q+1), \dots, |\mathcal{V}_1| + |\mathcal{V}_2|\} \\ 1, & \text{otherwise} \end{cases}. \end{aligned}$$

which is (29) for  $q + 1$  and  $k = k_q + 1$ .

In both cases we have obtained (29) for  $q + 1$  and  $k = k_q + 1$ . It remains to see that at any time step  $k \in \{k_q + 2, k_{q+1} - 1\}$  only local computation is performed and (27) implies that (29) also holds for  $q + 1$  and any  $k \in \{0, 1, \dots, k_{q+1}\}$ .

□

## D Proof of Theorem 4

By  $D_F(x, y)$  we denote Bregman distance  $D_F(x, y) := F(x) - F(y) - \langle \nabla F(y), x - y \rangle$ .

**Lemma 3.** Let  $\tau_2$  be defined as follows:

$$\tau_2 = \sqrt{\mu/L}. \quad (30)$$

Let  $\tau_1$  be defined as follows:

$$\tau_1 = (1/\tau_2 + 1/2)^{-1}. \quad (31)$$

Let  $\eta$  be defined as follows:

$$\eta = (L\tau_2)^{-1}. \quad (32)$$

Let  $\alpha$  be defined as follows:

$$\alpha = \mu/2. \quad (33)$$

Let  $\nu$  be defined as follows:

$$\nu = \mu/2. \quad (34)$$

Let  $\Psi_x^k$  be defined as follows:

$$\Psi_x^k = \left( \frac{1}{\eta} + \alpha \right) \|x^k - x^*\|^2 + \frac{2}{\tau_2} \left( D_f(x_f^k, x^*) - \frac{\nu}{2} \|x_f^k - x^*\|^2 \right) \quad (35)$$

Then the following inequality holds:

$$\Psi_x^{k+1} \leq \left( 1 - \frac{\sqrt{\mu}}{\sqrt{\mu} + 2\sqrt{L}} \right) \Psi_x^k + 2\langle y^{k+1} - y^*, x^{k+1} - x^* \rangle - \left( D_F(x_g^k, x^*) - \frac{\nu}{2} \|x_g^k - x^*\|^2 \right). \quad (36)$$

*Proof.*

$$\frac{1}{\eta} \|x^{k+1} - x^*\|^2 = \frac{1}{\eta} \|x^k - x^*\|^2 + \frac{2}{\eta} \langle x^{k+1} - x^k, x^{k+1} - x^* \rangle - \frac{1}{\eta} \|x^{k+1} - x^k\|^2.$$

Using Line 5 of Algorithm 1 we get

$$\begin{aligned} \frac{1}{\eta} \|x^{k+1} - x^*\|^2 &= \frac{1}{\eta} \|x^k - x^*\|^2 + 2\alpha \langle x_g^k - x^{k+1}, x^{k+1} - x^* \rangle \\ &\quad - 2\langle \nabla F(x_g^k) - \nu x_g^k - y^{k+1}, x^{k+1} - x^* \rangle - \frac{1}{\eta} \|x^{k+1} - x^k\|^2 \\ &= \frac{1}{\eta} \|x^k - x^*\|^2 + 2\alpha \langle x_g^k - x^* - x^{k+1} + x^*, x^{k+1} - x^* \rangle \\ &\quad - 2\langle \nabla F(x_g^k) - \nu x_g^k - y^{k+1}, x^{k+1} - x^* \rangle - \frac{1}{\eta} \|x^{k+1} - x^k\|^2 \\ &\leq \frac{1}{\eta} \|x^k - x^*\|^2 - \alpha \|x^{k+1} - x^*\|^2 + \alpha \|x_g^k - x^*\|^2 - 2\langle \nabla F(x_g^k) - \nu x_g^k - y^{k+1}, x^{k+1} - x^* \rangle \\ &\quad - \frac{1}{\eta} \|x^{k+1} - x^k\|^2. \end{aligned}$$

Using optimality condition (12) we get

$$\begin{aligned} \frac{1}{\eta} \|x^{k+1} - x^*\|^2 &\leq \frac{1}{\eta} \|x^k - x^*\|^2 - \alpha \|x^{k+1} - x^*\|^2 + \alpha \|x_g^k - x^*\|^2 - \frac{1}{\eta} \|x^{k+1} - x^k\|^2 \\ &\quad - 2\langle \nabla F(x_g^k) - \nabla F(x^*), x^{k+1} - x^* \rangle + 2\nu \langle x_g^k - x^*, x^{k+1} - x^* \rangle + 2\langle y^{k+1} - y^*, x^{k+1} - x^* \rangle. \end{aligned}$$

Using Line 6 of Algorithm 1 we get

$$\begin{aligned} \frac{1}{\eta} \|x^{k+1} - x^*\|^2 &\leq \frac{1}{\eta} \|x^k - x^*\|^2 - \alpha \|x^{k+1} - x^*\|^2 + \alpha \|x_g^k - x^*\|^2 - \frac{1}{\eta\tau_2^2} \|x_f^{k+1} - x_g^k\|^2 \\ &\quad - 2\langle \nabla F(x_g^k) - \nabla F(x^*), x^k - x^* \rangle + 2\nu \langle x_g^k - x^*, x^k - x^* \rangle + 2\langle y^{k+1} - y^*, x^{k+1} - x^* \rangle \end{aligned}$$

$$\begin{aligned}
& -\frac{2}{\tau_2} \langle \nabla F(x_g^k) - \nabla F(x^*), x_f^{k+1} - x_g^k \rangle + \frac{2\nu}{\tau_2} \langle x_g^k - x^*, x_f^{k+1} - x_g^k \rangle \\
& = \frac{1}{\eta} \|x^k - x^*\|^2 - \alpha \|x^{k+1} - x^*\|^2 + \alpha \|x_g^k - x^*\|^2 - \frac{1}{\eta\tau_2^2} \|x_f^{k+1} - x_g^k\|^2 \\
& - 2 \langle \nabla F(x_g^k) - \nabla F(x^*), x^k - x^* \rangle + 2\nu \langle x_g^k - x^*, x^k - x^* \rangle + 2 \langle y^{k+1} - y^*, x^{k+1} - x^* \rangle \\
& - \frac{2}{\tau_2} \langle \nabla F(x_g^k) - \nabla F(x^*), x_f^{k+1} - x_g^k \rangle + \frac{\nu}{\tau_2} \left( \|x_f^{k+1} - x^*\|^2 - \|x_g^k - x^*\|^2 - \|x_f^{k+1} - x_g^k\|^2 \right).
\end{aligned}$$

Using  $L$ -smoothness of  $D_F(x, x^*)$  in  $x$ , which follows from  $L$ -smoothness of  $F(x)$ , we get

$$\begin{aligned}
\frac{1}{\eta} \|x^{k+1} - x^*\|^2 & \leq \frac{1}{\eta} \|x^k - x^*\|^2 - \alpha \|x^{k+1} - x^*\|^2 + \alpha \|x_g^k - x^*\|^2 - \frac{1}{\eta\tau_2^2} \|x_f^{k+1} - x_g^k\|^2 \\
& - 2 \langle \nabla F(x_g^k) - \nabla F(x^*), x^k - x^* \rangle + 2\nu \langle x_g^k - x^*, x^k - x^* \rangle + 2 \langle y^{k+1} - y^*, x^{k+1} - x^* \rangle \\
& - \frac{2}{\tau_2} \langle \nabla F(x_g^k) - \nabla F(x^*), x_f^{k+1} - x_g^k \rangle + \frac{\nu}{\tau_2} \left( \|x_f^{k+1} - x^*\|^2 - \|x_g^k - x^*\|^2 - \|x_f^{k+1} - x_g^k\|^2 \right) \\
& \leq \frac{1}{\eta} \|x^k - x^*\|^2 - \alpha \|x^{k+1} - x^*\|^2 + \alpha \|x_g^k - x^*\|^2 - \frac{1}{\eta\tau_2^2} \|x_f^{k+1} - x_g^k\|^2 \\
& - 2 \langle \nabla F(x_g^k) - \nabla F(x^*), x^k - x^* \rangle + 2\nu \langle x_g^k - x^*, x^k - x^* \rangle + 2 \langle y^{k+1} - y^*, x^{k+1} - x^* \rangle \\
& - \frac{2}{\tau_2} \left( D_f(x_f^{k+1}, x^*) - D_f(x_g^k, x^*) - \frac{L}{2} \|x_f^{k+1} - x_g^k\|^2 \right) \\
& + \frac{\nu}{\tau_2} \left( \|x_f^{k+1} - x^*\|^2 - \|x_g^k - x^*\|^2 - \|x_f^{k+1} - x_g^k\|^2 \right) \\
& = \frac{1}{\eta} \|x^k - x^*\|^2 - \alpha \|x^{k+1} - x^*\|^2 + \alpha \|x_g^k - x^*\|^2 + \left( \frac{L-\nu}{\tau_2} - \frac{1}{\eta\tau_2^2} \right) \|x_f^{k+1} - x_g^k\|^2 \\
& - 2 \langle \nabla F(x_g^k) - \nabla F(x^*), x^k - x^* \rangle + 2\nu \langle x_g^k - x^*, x^k - x^* \rangle + 2 \langle y^{k+1} - y^*, x^{k+1} - x^* \rangle \\
& - \frac{2}{\tau_2} \left( D_f(x_f^{k+1}, x^*) - D_f(x_g^k, x^*) \right) + \frac{\nu}{\tau_2} \left( \|x_f^{k+1} - x^*\|^2 - \|x_g^k - x^*\|^2 \right)
\end{aligned}$$

Using Line 4 of Algorithm 1 we get

$$\begin{aligned}
\frac{1}{\eta} \|x^{k+1} - x^*\|^2 & \leq \frac{1}{\eta} \|x^k - x^*\|^2 - \alpha \|x^{k+1} - x^*\|^2 + \alpha \|x_g^k - x^*\|^2 + \left( \frac{L-\nu}{\tau_2} - \frac{1}{\eta\tau_2^2} \right) \|x_f^{k+1} - x_g^k\|^2 \\
& - 2 \langle \nabla F(x_g^k) - \nabla F(x^*), x_g^k - x^* \rangle + 2\nu \|x_g^k - x^*\|^2 + \frac{2(1-\tau_1)}{\tau_1} \langle \nabla F(x_g^k) - \nabla F(x^*), x_f^k - x_g^k \rangle \\
& + \frac{2\nu(1-\tau_1)}{\tau_1} \langle x_g^k - x_f^k, x_g^k - x^* \rangle + 2 \langle y^{k+1} - y^*, x^{k+1} - x^* \rangle \\
& - \frac{2}{\tau_2} \left( D_f(x_f^{k+1}, x^*) - D_f(x_g^k, x^*) \right) + \frac{\nu}{\tau_2} \left( \|x_f^{k+1} - x^*\|^2 - \|x_g^k - x^*\|^2 \right) \\
& = \frac{1}{\eta} \|x^k - x^*\|^2 - \alpha \|x^{k+1} - x^*\|^2 + \alpha \|x_g^k - x^*\|^2 + \left( \frac{L-\nu}{\tau_2} - \frac{1}{\eta\tau_2^2} \right) \|x_f^{k+1} - x_g^k\|^2 \\
& - 2 \langle \nabla F(x_g^k) - \nabla F(x^*), x_g^k - x^* \rangle + 2\nu \|x_g^k - x^*\|^2 + \frac{2(1-\tau_1)}{\tau_1} \langle \nabla F(x_g^k) - \nabla F(x^*), x_f^k - x_g^k \rangle \\
& + \frac{\nu(1-\tau_1)}{\tau_1} \left( \|x_g^k - x_f^k\|^2 + \|x_g^k - x^*\|^2 - \|x_f^k - x^*\|^2 \right) + 2 \langle y^{k+1} - y^*, x^{k+1} - x^* \rangle \\
& - \frac{2}{\tau_2} \left( D_f(x_f^{k+1}, x^*) - D_f(x_g^k, x^*) \right) + \frac{\nu}{\tau_2} \left( \|x_f^{k+1} - x^*\|^2 - \|x_g^k - x^*\|^2 \right).
\end{aligned}$$

Using  $\mu$ -strong convexity of  $D_F(x, x^*)$  in  $x$ , which follows from  $\mu$ -strong convexity of  $F(x)$ , we get

$$\begin{aligned}
\frac{1}{\eta} \|x^{k+1} - x^*\|^2 & \leq \frac{1}{\eta} \|x^k - x^*\|^2 - \alpha \|x^{k+1} - x^*\|^2 + \alpha \|x_g^k - x^*\|^2 + \left( \frac{L-\nu}{\tau_2} - \frac{1}{\eta\tau_2^2} \right) \|x_f^{k+1} - x_g^k\|^2 \\
& - 2D_F(x_g^k, x^*) - \mu \|x_g^k - x^*\|^2 + 2\nu \|x_g^k - x^*\|^2
\end{aligned}$$

$$\begin{aligned}
& + \frac{2(1-\tau_1)}{\tau_1} \left( D_F(x_f^k, x^*) - D_F(x_g^k, x^*) - \frac{\mu}{2} \|x_f^k - x_g^k\|^2 \right) \\
& + \frac{\nu(1-\tau_1)}{\tau_1} (\|x_g^k - x_f^k\|^2 + \|x_g^k - x^*\|^2 - \|x_f^k - x^*\|^2) + 2\langle y^{k+1} - y^*, x^{k+1} - x^* \rangle \\
& - \frac{2}{\tau_2} \left( D_f(x_f^{k+1}, x^*) - D_f(x_g^k, x^*) \right) + \frac{\nu}{\tau_2} (\|x_f^{k+1} - x^*\|^2 - \|x_g^k - x^*\|^2) \\
& = \frac{1}{\eta} \|x^k - x^*\|^2 - \alpha \|x^{k+1} - x^*\|^2 + \frac{2(1-\tau_1)}{\tau_1} \left( D_F(x_f^k, x^*) - \frac{\nu}{2} \|x_f^k - x^*\|^2 \right) \\
& - \frac{2}{\tau_2} \left( D_f(x_f^{k+1}, x^*) - \frac{\nu}{2} \|x_f^{k+1} - x^*\|^2 \right) + 2\langle y^{k+1} - y^*, x^{k+1} - x^* \rangle \\
& + 2 \left( \frac{1}{\tau_2} - \frac{1}{\tau_1} \right) D_F(x_g^k, x^*) + \left( \alpha - \mu + \nu + \frac{\nu}{\tau_1} - \frac{\nu}{\tau_2} \right) \|x_g^k - x^*\|^2 \\
& + \left( \frac{L-\nu}{\tau_2} - \frac{1}{\eta\tau_2^2} \right) \|x_f^{k+1} - x_g^k\|^2 + \frac{(1-\tau_1)(\nu-\mu)}{\tau_1} \|x_f^k - x_g^k\|^2.
\end{aligned}$$

Using  $\eta$  defined by (32),  $\tau_1$  defined by (31) and the fact that  $\nu < \mu$  we get

$$\begin{aligned}
\frac{1}{\eta} \|x^{k+1} - x^*\|^2 & \leq \frac{1}{\eta} \|x^k - x^*\|^2 - \alpha \|x^{k+1} - x^*\|^2 + \frac{2(1-\tau_2/2)}{\tau_2} \left( D_F(x_f^k, x^*) - \frac{\nu}{2} \|x_f^k - x^*\|^2 \right) \\
& - \frac{2}{\tau_2} \left( D_f(x_f^{k+1}, x^*) - \frac{\nu}{2} \|x_f^{k+1} - x^*\|^2 \right) + 2\langle y^{k+1} - y^*, x^{k+1} - x^* \rangle \\
& - D_F(x_g^k, x^*) + \left( \alpha - \mu + \frac{3\nu}{2} \right) \|x_g^k - x^*\|^2.
\end{aligned}$$

Using  $\alpha$  defined by (33) and  $\nu$  defined by (34) we get

$$\begin{aligned}
\frac{1}{\eta} \|x^{k+1} - x^*\|^2 & \leq \frac{1}{\eta} \|x^k - x^*\|^2 - \alpha \|x^{k+1} - x^*\|^2 + \frac{2(1-\tau_2/2)}{\tau_2} \left( D_F(x_f^k, x^*) - \frac{\nu}{2} \|x_f^k - x^*\|^2 \right) \\
& - \frac{2}{\tau_2} \left( D_f(x_f^{k+1}, x^*) - \frac{\nu}{2} \|x_f^{k+1} - x^*\|^2 \right) + 2\langle y^{k+1} - y^*, x^{k+1} - x^* \rangle \\
& - \left( D_F(x_g^k, x^*) - \frac{\nu}{2} \|x_g^k - x^*\|^2 \right).
\end{aligned}$$

After rearranging and using  $\Psi_x^k$  definition (35) we get

$$\begin{aligned}
\Psi_x^{k+1} & \leq \max \{1 - \tau_2/2, 1/(1 + \eta\alpha)\} \Psi_x^k + 2\langle y^{k+1} - y^*, x^{k+1} - x^* \rangle - \left( D_F(x_g^k, x^*) - \frac{\nu}{2} \|x_g^k - x^*\|^2 \right) \\
& \leq \left( 1 - \frac{\sqrt{\mu}}{\sqrt{\mu} + 2\sqrt{L}} \right) \Psi_x^k + 2\langle y^{k+1} - y^*, x^{k+1} - x^* \rangle - \left( D_F(x_g^k, x^*) - \frac{\nu}{2} \|x_g^k - x^*\|^2 \right).
\end{aligned}$$

□

**Lemma 4.** *The following inequality holds:*

$$\begin{aligned}
-\|y^{k+1} - y^*\|^2 & \leq \frac{(1-\sigma_1)}{\sigma_1} \|y_f^k - y^*\|^2 - \frac{1}{\sigma_2} \|y_f^{k+1} - y^*\|^2 \\
& - \left( \frac{1}{\sigma_1} - \frac{1}{\sigma_2} \right) \|y_g^k - y^*\|^2 + (\sigma_2 - \sigma_1) \|y^{k+1} - y^k\|^2
\end{aligned} \tag{37}$$

*Proof.* Lines 7 and 9 of Algorithm 1 imply

$$\begin{aligned}
y_f^{k+1} & = y_g^k + \sigma_2(y^{k+1} - y_k) \\
& = y_g^k + \sigma_2 y^{k+1} - \frac{\sigma_2}{\sigma_1} (y_g^k - (1-\sigma_1)y_f^k) \\
& = \left( 1 - \frac{\sigma_2}{\sigma_1} \right) y_g^k + \sigma_2 y^{k+1} + \left( \frac{\sigma_2}{\sigma_1} - \sigma_2 \right) y_f^k.
\end{aligned}$$

After subtracting  $y^*$  and rearranging we get

$$(y_f^{k+1} - y^*) + \left(\frac{\sigma_2}{\sigma_1} - 1\right)(y_g^k - y^*) = \sigma_2(y^{k+1} - y^*) + \left(\frac{\sigma_2}{\sigma_1} - \sigma_2\right)(y_f^k - y^*).$$

Multiplying both sides by  $\frac{\sigma_1}{\sigma_2}$  gives

$$\frac{\sigma_1}{\sigma_2}(y_f^{k+1} - y^*) + \left(1 - \frac{\sigma_1}{\sigma_2}\right)(y_g^k - y^*) = \sigma_1(y^{k+1} - y^*) + (1 - \sigma_1)(y_f^k - y^*).$$

Squaring both sides gives

$$\frac{\sigma_1}{\sigma_2}\|y_f^{k+1} - y^*\|^2 + \left(1 - \frac{\sigma_1}{\sigma_2}\right)\|y_g^k - y^*\|^2 - \frac{\sigma_1}{\sigma_2}\left(1 - \frac{\sigma_1}{\sigma_2}\right)\|y_f^{k+1} - y_g^k\|^2 \leq \sigma_1\|y^{k+1} - y^*\|^2 + (1 - \sigma_1)\|y_f^k - y^*\|^2.$$

Rearranging gives

$$-\|y^{k+1} - y^*\|^2 \leq -\left(\frac{1}{\sigma_1} - \frac{1}{\sigma_2}\right)\|y_g^k - y^*\|^2 + \frac{(1 - \sigma_1)}{\sigma_1}\|y_f^k - y^*\|^2 - \frac{1}{\sigma_2}\|y_f^{k+1} - y^*\|^2 + \frac{1}{\sigma_2}\left(1 - \frac{\sigma_1}{\sigma_2}\right)\|y_f^{k+1} - y_g^k\|^2.$$

Using Line 9 of Algorithm 1 we get

$$-\|y^{k+1} - y^*\|^2 \leq -\left(\frac{1}{\sigma_1} - \frac{1}{\sigma_2}\right)\|y_g^k - y^*\|^2 + \frac{(1 - \sigma_1)}{\sigma_1}\|y_f^k - y^*\|^2 - \frac{1}{\sigma_2}\|y_f^{k+1} - y^*\|^2 + (\sigma_2 - \sigma_1)\|y^{k+1} - y^k\|^2.$$

□



**Lemma 5.** Let  $\beta$  be defined as follows:

$$\beta = 1/(2L). \quad (38)$$

Let  $\sigma_1$  be defined as follows:

$$\sigma_1 = (1/\sigma_2 + 1/2)^{-1}. \quad (39)$$

Then the following inequality holds:

$$\begin{aligned} & \left(\frac{1}{\theta} + \frac{\beta}{2}\right) \|y^{k+1} - y^*\|^2 + \frac{\beta}{2\sigma_2} \|y_f^{k+1} - y^*\|^2 \\ & \leq \frac{1}{\theta} \|y^k - y^*\|^2 + \frac{\beta(1 - \sigma_2/2)}{2\sigma_2} \|y_f^k - y^*\|^2 + D_F(x_g^k, x^*) - \frac{\nu}{2} \|x_g^k - x^*\|^2 - 2\langle x^{k+1} - x^*, y^{k+1} - y^* \rangle \\ & \quad - 2\nu^{-1} \langle y_g^k + z_g^k - (y^* + z^*), y^{k+1} - y^* \rangle - \frac{\beta}{4} \|y_g^k - y^*\|^2 + \left(\frac{\beta\sigma_2^2}{4} - \frac{1}{\theta}\right) \|y^{k+1} - y^k\|^2. \end{aligned} \quad (40)$$

*Proof.*

$$\frac{1}{\theta} \|y^{k+1} - y^*\|^2 = \frac{1}{\theta} \|y^k - y^*\|^2 + \frac{2}{\theta} \langle x^{k+1} - x^k, x^{k+1} - x^* \rangle - \frac{1}{\theta} \|y^{k+1} - y^k\|^2.$$

Using Line 8 of Algorithm 1 we get

$$\begin{aligned} \frac{1}{\theta} \|y^{k+1} - y^*\|^2 &= \frac{1}{\theta} \|y^k - y^*\|^2 + 2\beta \langle \nabla F(x_g^k) - \nu x_g^k - y^{k+1}, y^{k+1} - y^* \rangle \\ & \quad - 2\langle \nu^{-1}(y_g^k + z_g^k) + x^{k+1}, y^{k+1} - y^* \rangle - \frac{1}{\theta} \|y^{k+1} - y^k\|^2. \end{aligned}$$

Using optimality condition (12) we get

$$\begin{aligned} \frac{1}{\theta} \|y^{k+1} - y^*\|^2 &= \frac{1}{\theta} \|y^k - y^*\|^2 + 2\beta \langle \nabla F(x_g^k) - \nu x_g^k - (\nabla F(x^*) - \nu x^*) + y^* - y^{k+1}, y^{k+1} - y^* \rangle \\ & \quad - 2\langle \nu^{-1}(y_g^k + z_g^k) + x^{k+1}, y^{k+1} - y^* \rangle - \frac{1}{\theta} \|y^{k+1} - y^k\|^2 \\ &= \frac{1}{\theta} \|y^k - y^*\|^2 + 2\beta \langle \nabla F(x_g^k) - \nu x_g^k - (\nabla F(x^*) - \nu x^*), y^{k+1} - y^* \rangle - 2\beta \|y^{k+1} - y^*\|^2 \\ & \quad - 2\langle \nu^{-1}(y_g^k + z_g^k) + x^{k+1}, y^{k+1} - y^* \rangle - \frac{1}{\theta} \|y^{k+1} - y^k\|^2 \\ &\leq \frac{1}{\theta} \|y^k - y^*\|^2 + \beta \|\nabla F(x_g^k) - \nu x_g^k - (\nabla F(x^*) - \nu x^*)\|^2 - \beta \|y^{k+1} - y^*\|^2 \\ & \quad - 2\langle \nu^{-1}(y_g^k + z_g^k) + x^{k+1}, y^{k+1} - y^* \rangle - \frac{1}{\theta} \|y^{k+1} - y^k\|^2. \end{aligned}$$

Function  $F(x) - \frac{\nu}{2} \|x\|^2$  is convex and  $L$ -smooth, which implies

$$\begin{aligned} \frac{1}{\theta} \|y^{k+1} - y^*\|^2 &\leq \frac{1}{\theta} \|y^k - y^*\|^2 + 2\beta L \left( D_F(x_g^k, x^*) - \frac{\nu}{2} \|x_g^k - x^*\|^2 \right) - \beta \|y^{k+1} - y^*\|^2 \\ & \quad - 2\langle \nu^{-1}(y_g^k + z_g^k) + x^{k+1}, y^{k+1} - y^* \rangle - \frac{1}{\theta} \|y^{k+1} - y^k\|^2. \end{aligned}$$

Using  $\beta$  definition (38) we get

$$\begin{aligned} \frac{1}{\theta} \|y^{k+1} - y^*\|^2 &\leq \frac{1}{\theta} \|y^k - y^*\|^2 + D_F(x_g^k, x^*) - \frac{\nu}{2} \|x_g^k - x^*\|^2 - \beta \|y^{k+1} - y^*\|^2 \\ & \quad - 2\langle \nu^{-1}(y_g^k + z_g^k) + x^{k+1}, y^{k+1} - y^* \rangle - \frac{1}{\theta} \|y^{k+1} - y^k\|^2. \end{aligned}$$

Using optimality condition (13) we get

$$\begin{aligned} \frac{1}{\theta} \|y^{k+1} - y^*\|^2 &\leq \frac{1}{\theta} \|y^k - y^*\|^2 + D_F(x_g^k, x^*) - \frac{\nu}{2} \|x_g^k - x^*\|^2 - \beta \|y^{k+1} - y^*\|^2 \\ & \quad - 2\nu^{-1} \langle y_g^k + z_g^k - (y^* + z^*), y^{k+1} - y^* \rangle - 2\langle x^{k+1} - x^*, y^{k+1} - y^* \rangle - \frac{1}{\theta} \|y^{k+1} - y^k\|^2. \end{aligned}$$

Using (37) together with  $\sigma_1$  definition (39) we get

$$\begin{aligned}
\frac{1}{\theta} \|y^{k+1} - y^*\|^2 &\leq \frac{1}{\theta} \|y^k - y^*\|^2 + \mathsf{D}_F(x_g^k, x^*) - \frac{\nu}{2} \|x_g^k - x^*\|^2 - \frac{\beta}{2} \|y^{k+1} - y^*\|^2 \\
&\quad + \frac{\beta(1 - \sigma_2/2)}{2\sigma_2} \|y_f^k - y^*\|^2 - \frac{\beta}{2\sigma_2} \|y_f^{k+1} - y^*\|^2 - \frac{\beta}{4} \|y_g^k - y^*\|^2 + \frac{\beta(\sigma_2 - \sigma_1)}{2} \|y^{k+1} - y^k\|^2 \\
&\quad - 2\nu^{-1} \langle y_g^k + z_g^k - (y^* + z^*), y^{k+1} - y^* \rangle - 2 \langle x^{k+1} - x^*, y^{k+1} - y^* \rangle - \frac{1}{\theta} \|y^{k+1} - y^k\|^2 \\
&\leq \frac{1}{\theta} \|y^k - y^*\|^2 - \frac{\beta}{2} \|y^{k+1} - y^*\|^2 + \frac{\beta(1 - \sigma_2/2)}{2\sigma_2} \|y_f^k - y^*\|^2 - \frac{\beta}{2\sigma_2} \|y_f^{k+1} - y^*\|^2 \\
&\quad + \mathsf{D}_F(x_g^k, x^*) - \frac{\nu}{2} \|x_g^k - x^*\|^2 - \frac{\beta}{4} \|y_g^k - y^*\|^2 + \left( \frac{\beta\sigma_2^2}{4} - \frac{1}{\theta} \right) \|y^{k+1} - y^k\|^2 \\
&\quad - 2\nu^{-1} \langle y_g^k + z_g^k - (y^* + z^*), y^{k+1} - y^* \rangle - 2 \langle x^{k+1} - x^*, y^{k+1} - y^* \rangle.
\end{aligned}$$

Rearranging gives

$$\begin{aligned}
&\left( \frac{1}{\theta} + \frac{\beta}{2} \right) \|y^{k+1} - y^*\|^2 + \frac{\beta}{2\sigma_2} \|y_f^{k+1} - y^*\|^2 \\
&\leq \frac{1}{\theta} \|y^k - y^*\|^2 + \frac{\beta(1 - \sigma_2/2)}{2\sigma_2} \|y_f^k - y^*\|^2 + \mathsf{D}_F(x_g^k, x^*) - \frac{\nu}{2} \|x_g^k - x^*\|^2 - 2 \langle x^{k+1} - x^*, y^{k+1} - y^* \rangle \\
&\quad - 2\nu^{-1} \langle y_g^k + z_g^k - (y^* + z^*), y^{k+1} - y^* \rangle - \frac{\beta}{4} \|y_g^k - y^*\|^2 + \left( \frac{\beta\sigma_2^2}{4} - \frac{1}{\theta} \right) \|y^{k+1} - y^k\|^2.
\end{aligned}$$

□

**Lemma 6.** *The following inequality holds:*

$$\|m^k\|_{\mathbf{P}}^2 \leq 8\chi^2\gamma^2\nu^{-2}\|y_g^k + z_g^k\|_{\mathbf{P}}^2 + 4\chi(1 - (4\chi)^{-1})\|m^k\|_{\mathbf{P}}^2 - 4\chi\|m^{k+1}\|_{\mathbf{P}}^2. \quad (41)$$

*Proof.* Using Line 12 of Algorithm 1 we get

$$\begin{aligned} \|m^{k+1}\|_{\mathbf{P}}^2 &= \|\gamma\nu^{-1}(y_g^k + z_g^k) + m^k - (\mathbf{W}(k) \otimes \mathbf{I}_d) [\gamma\nu^{-1}(y_g^k + z_g^k) + m^k]\|_{\mathbf{P}}^2 \\ &= \|\mathbf{P} [\gamma\nu^{-1}(y_g^k + z_g^k) + m^k] - (\mathbf{W}(k) \otimes \mathbf{I}_d)\mathbf{P} [\gamma\nu^{-1}(y_g^k + z_g^k) + m^k]\|_{\mathbf{P}}^2. \end{aligned}$$

Using property (3) we obtain

$$\|m^{k+1}\|_{\mathbf{P}}^2 \leq (1 - \chi^{-1})\|m^k + \gamma\nu^{-1}(y_g^k + z_g^k)\|_{\mathbf{P}}^2.$$

Using inequality  $\|a + b\|^2 \leq (1 + c)\|a\|^2 + (1 + c^{-1})\|b\|^2$  with  $c = \frac{1}{2(\chi-1)}$  we get

$$\begin{aligned} \|m^{k+1}\|_{\mathbf{P}}^2 &\leq (1 - \chi^{-1}) \left[ \left(1 + \frac{1}{2(\chi-1)}\right) \|m^k\|_{\mathbf{P}}^2 + (1 + 2(\chi-1))\gamma^2\nu^{-2}\|y_g^k + z_g^k\|_{\mathbf{P}}^2 \right] \\ &\leq (1 - (2\chi)^{-1})\|m^k\|_{\mathbf{P}}^2 + 2\chi\gamma^2\nu^{-2}\|y_g^k + z_g^k\|_{\mathbf{P}}^2. \end{aligned}$$

Rearranging gives

$$\|m^k\|_{\mathbf{P}}^2 \leq 8\chi^2\gamma^2\nu^{-2}\|y_g^k + z_g^k\|_{\mathbf{P}}^2 + 4\chi(1 - (4\chi)^{-1})\|m^k\|_{\mathbf{P}}^2 - 4\chi\|m^{k+1}\|_{\mathbf{P}}^2. \quad \square$$

**Lemma 7.** *Let  $\hat{z}^k$  be defined as follows:*

$$\hat{z}^k = z^k - \mathbf{P}m^k. \quad (42)$$

*Then the following inequality holds:*

$$\begin{aligned} \frac{1}{\gamma}\|\hat{z}^{k+1} - z^*\|^2 + \frac{4}{3\gamma}\|m^{k+1}\|_{\mathbf{P}}^2 &\leq \left(\frac{1}{\gamma} - \delta\right)\|\hat{z}^k - z^*\|^2 + \left(1 - (4\chi)^{-1} + \frac{3\gamma\delta}{2}\right)\frac{4}{3\gamma}\|m^k\|_{\mathbf{P}}^2 \\ &\quad - 2\nu^{-1}\langle y_g^k + z_g^k - (y^* + z^*), z^k - z^* \rangle + \gamma\nu^{-2}(1 + 6\chi)\|y_g^k + z_g^k\|_{\mathbf{P}}^2 \\ &\quad + 2\delta\|z_g^k - z^*\|^2 + (2\gamma\delta^2 - \delta)\|z_g^k - z^k\|^2. \end{aligned} \quad (43)$$

*Proof.*

$$\frac{1}{\gamma}\|\hat{z}^{k+1} - z^*\|^2 = \frac{1}{\gamma}\|\hat{z}^k - z^*\|^2 + \frac{2}{\gamma}\langle \hat{z}^{k+1} - \hat{z}^k, \hat{z}^k - z^* \rangle + \frac{1}{\gamma}\|\hat{z}^{k+1} - \hat{z}^k\|^2.$$

Lines 11 and 12 of Algorithm 1 together with  $\hat{z}^k$  definition (42) imply

$$\hat{z}^{k+1} - \hat{z}^k = \gamma\delta(z_g^k - z^k) - \gamma\nu^{-1}\mathbf{P}(y_g^k + z_g^k).$$

Hence,

$$\begin{aligned} \frac{1}{\gamma}\|\hat{z}^{k+1} - z^*\|^2 &= \frac{1}{\gamma}\|\hat{z}^k - z^*\|^2 + 2\delta\langle z_g^k - z^k, \hat{z}^k - z^* \rangle - 2\nu^{-1}\langle \mathbf{P}(y_g^k + z_g^k), \hat{z}^k - z^* \rangle + \frac{1}{\gamma}\|\hat{z}^{k+1} - \hat{z}^k\|^2 \\ &= \frac{1}{\gamma}\|\hat{z}^k - z^*\|^2 + \delta\|z_g^k - \mathbf{P}m^k - z^*\|^2 - \delta\|\hat{z}^k - z^*\|^2 - \delta\|z_g^k - z^k\|^2 \\ &\quad - 2\nu^{-1}\langle \mathbf{P}(y_g^k + z_g^k), \hat{z}^k - z^* \rangle + \gamma\|\delta(z_g^k - z^k) - \nu^{-1}\mathbf{P}(y_g^k + z_g^k)\|^2 \\ &\leq \left(\frac{1}{\gamma} - \delta\right)\|\hat{z}^k - z^*\|^2 + 2\delta\|z_g^k - z^*\|^2 + 2\delta\|m^k\|_{\mathbf{P}}^2 - \delta\|z_g^k - z^k\|^2 \\ &\quad - 2\nu^{-1}\langle \mathbf{P}(y_g^k + z_g^k), \hat{z}^k - z^* \rangle + 2\gamma\delta^2\|z_g^k - z^k\|^2 + \gamma\|\nu^{-1}\mathbf{P}(y_g^k + z_g^k)\|^2 \\ &\leq \left(\frac{1}{\gamma} - \delta\right)\|\hat{z}^k - z^*\|^2 + 2\delta\|z_g^k - z^*\|^2 + (2\gamma\delta^2 - \delta)\|z_g^k - z^k\|^2 \\ &\quad - 2\nu^{-1}\langle \mathbf{P}(y_g^k + z_g^k), z^k - z^* \rangle + \gamma\|\nu^{-1}\mathbf{P}(y_g^k + z_g^k)\|^2 + 2\delta\|m^k\|_{\mathbf{P}}^2 + 2\nu^{-1}\langle \mathbf{P}(y_g^k + z_g^k), m^k \rangle. \end{aligned}$$

Using the fact that  $z^k \in \mathcal{L}^\perp$  for all  $k = 0, 1, 2, \dots$  and optimality condition (14) we get

$$\begin{aligned} \frac{1}{\gamma} \|\hat{z}^{k+1} - z^*\|^2 &\leq \left(\frac{1}{\gamma} - \delta\right) \|\hat{z}^k - z^*\|^2 + 2\delta \|z_g^k - z^*\|^2 + (2\gamma\delta^2 - \delta) \|z_g^k - z^k\|^2 \\ &\quad - 2\nu^{-1} \langle y_g^k + z_g^k - (y^* + z^*), z^k - z^* \rangle + \gamma\nu^{-2} \|y_g^k + z_g^k\|_{\mathbf{P}}^2 \\ &\quad + 2\delta \|m^k\|_{\mathbf{P}}^2 + 2\nu^{-1} \langle \mathbf{P}(y_g^k + z_g^k), m^k \rangle. \end{aligned}$$

Using Young's inequality we get

$$\begin{aligned} \frac{1}{\gamma} \|\hat{z}^{k+1} - z^*\|^2 &\leq \left(\frac{1}{\gamma} - \delta\right) \|\hat{z}^k - z^*\|^2 + 2\delta \|z_g^k - z^*\|^2 + (2\gamma\delta^2 - \delta) \|z_g^k - z^k\|^2 \\ &\quad - 2\nu^{-1} \langle y_g^k + z_g^k - (y^* + z^*), z^k - z^* \rangle + \gamma\nu^{-2} \|y_g^k + z_g^k\|_{\mathbf{P}}^2 \\ &\quad + 2\delta \|m^k\|_{\mathbf{P}}^2 + 3\gamma\chi\nu^{-2} \|y_g^k + z_g^k\|_{\mathbf{P}}^2 + \frac{1}{3\gamma\chi} \|m^k\|_{\mathbf{P}}^2. \end{aligned}$$

Using (41) we get

$$\begin{aligned} \frac{1}{\gamma} \|\hat{z}^{k+1} - z^*\|^2 &\leq \left(\frac{1}{\gamma} - \delta\right) \|\hat{z}^k - z^*\|^2 + 2\delta \|z_g^k - z^*\|^2 + (2\gamma\delta^2 - \delta) \|z_g^k - z^k\|^2 \\ &\quad - 2\nu^{-1} \langle y_g^k + z_g^k - (y^* + z^*), z^k - z^* \rangle + \gamma\nu^{-2} \|y_g^k + z_g^k\|_{\mathbf{P}}^2 \\ &\quad + 2\delta \|m^k\|_{\mathbf{P}}^2 + 6\gamma\nu^{-2}\chi \|y_g^k + z_g^k\|_{\mathbf{P}}^2 + \frac{4(1 - (4\chi)^{-1})}{3\gamma} \|m^k\|_{\mathbf{P}}^2 - \frac{4}{3\gamma} \|m^{k+1}\|_{\mathbf{P}}^2 \\ &= \left(\frac{1}{\gamma} - \delta\right) \|\hat{z}^k - z^*\|^2 + 2\delta \|z_g^k - z^*\|^2 + (2\gamma\delta^2 - \delta) \|z_g^k - z^k\|^2 \\ &\quad - 2\nu^{-1} \langle y_g^k + z_g^k - (y^* + z^*), z^k - z^* \rangle + \gamma\nu^{-2} (1 + 6\chi) \|y_g^k + z_g^k\|_{\mathbf{P}}^2 \\ &\quad + \left(1 - (4\chi)^{-1} + \frac{3\gamma\delta}{2}\right) \frac{4}{3\gamma} \|m^k\|_{\mathbf{P}}^2 - \frac{4}{3\gamma} \|m^{k+1}\|_{\mathbf{P}}^2. \end{aligned}$$

□

**Lemma 8.** *The following inequality holds:*

$$\begin{aligned} &2 \langle y_g^k + z_g^k - (y^* + z^*), y^k + z^k - (y^* + z^*) \rangle \\ &\geq 2 \|y_g^k + z_g^k - (y^* + z^*)\|^2 + \frac{(1 - \sigma_2/2)}{\sigma_2} (\|y_g^k + z_g^k - (y^* + z^*)\|^2 - \|y_f^k + z_f^k - (y^* + z^*)\|^2). \end{aligned} \quad (44)$$

*Proof.*

$$\begin{aligned} &2 \langle y_g^k + z_g^k - (y^* + z^*), y^k + z^k - (y^* + z^*) \rangle \\ &= 2 \|y_g^k + z_g^k - (y^* + z^*)\|^2 + 2 \langle y_g^k + z_g^k - (y^* + z^*), y^k + z^k - (y_g^k + z_g^k) \rangle. \end{aligned}$$

Using Lines 7 and 10 of Algorithm 1 we get

$$\begin{aligned} &2 \langle y_g^k + z_g^k - (y^* + z^*), y^k + z^k - (y^* + z^*) \rangle \\ &= 2 \|y_g^k + z_g^k - (y^* + z^*)\|^2 + \frac{2(1 - \sigma_1)}{\sigma_1} \langle y_g^k + z_g^k - (y^* + z^*), y_g^k + z_g^k - (y_f^k + z_f^k) \rangle \\ &= 2 \|y_g^k + z_g^k - (y^* + z^*)\|^2 \\ &\quad + \frac{(1 - \sigma_1)}{\sigma_1} (\|y_g^k + z_g^k - (y^* + z^*)\|^2 + \|y_g^k + z_g^k - (y_f^k + z_f^k)\|^2 - \|y_f^k + z_f^k - (y^* + z^*)\|^2) \\ &\geq 2 \|y_g^k + z_g^k - (y^* + z^*)\|^2 + \frac{(1 - \sigma_1)}{\sigma_1} (\|y_g^k + z_g^k - (y^* + z^*)\|^2 - \|y_f^k + z_f^k - (y^* + z^*)\|^2). \end{aligned}$$

Using  $\sigma_1$  definition (39) we get

$$\begin{aligned} &2 \langle y_g^k + z_g^k - (y^* + z^*), y^k + z^k - (y^* + z^*) \rangle \\ &\geq 2 \|y_g^k + z_g^k - (y^* + z^*)\|^2 + \frac{(1 - \sigma_2/2)}{\sigma_2} (\|y_g^k + z_g^k - (y^* + z^*)\|^2 - \|y_f^k + z_f^k - (y^* + z^*)\|^2). \end{aligned}$$

□

**Lemma 9.** Let  $\zeta$  be defined by

$$\zeta = 1/2. \quad (45)$$

Then the following inequality holds:

$$\begin{aligned} & -2\langle y^{k+1} - y^k, y_g^k + z_g^k - (y^* + z^*) \rangle \\ & \leq \frac{1}{\sigma_2} \|y_g^k + z_g^k - (y^* + z^*)\|^2 - \frac{1}{\sigma_2} \|y_f^{k+1} + z_f^{k+1} - (y^* + z^*)\|^2 \\ & + 2\sigma_2 \|y^{k+1} - y^k\|^2 - \frac{1}{2\sigma_2\chi} \|y_g^k + z_g^k\|_{\mathbf{P}}^2. \end{aligned} \quad (46)$$

*Proof.*

$$\begin{aligned} & \|y_f^{k+1} + z_f^{k+1} - (y^* + z^*)\|^2 \\ & = \|y_g^k + z_g^k - (y^* + z^*)\|^2 + 2\langle y_f^{k+1} + z_f^{k+1} - (y_g^k + z_g^k), y_g^k + z_g^k - (y^* + z^*) \rangle \\ & + \|y_f^{k+1} + z_f^{k+1} - (y_g^k + z_g^k)\|^2 \\ & \leq \|y_g^k + z_g^k - (y^* + z^*)\|^2 + 2\langle y_f^{k+1} + z_f^{k+1} - (y_g^k + z_g^k), y_g^k + z_g^k - (y^* + z^*) \rangle \\ & + 2\|y_f^{k+1} - y_g^k\|^2 + 2\|z_f^{k+1} - z_g^k\|^2. \end{aligned}$$

Using Line 9 of Algorithm 1 we get

$$\begin{aligned} & \|y_f^{k+1} + z_f^{k+1} - (y^* + z^*)\|^2 \\ & \leq \|y_g^k + z_g^k - (y^* + z^*)\|^2 + 2\sigma_2 \langle y^{k+1} - y^k, y_g^k + z_g^k - (y^* + z^*) \rangle + 2\sigma_2^2 \|y^{k+1} - y^k\|^2 \\ & + 2\langle z_f^{k+1} - z_g^k, y_g^k + z_g^k - (y^* + z^*) \rangle + 2\|z_f^{k+1} - z_g^k\|^2. \end{aligned}$$

Using Line 13 of Algorithm 1 and optimality condition (14) we get

$$\begin{aligned} & \|y_f^{k+1} + z_f^{k+1} - (y^* + z^*)\|^2 \\ & \leq \|y_g^k + z_g^k - (y^* + z^*)\|^2 + 2\sigma_2 \langle y^{k+1} - y^k, y_g^k + z_g^k - (y^* + z^*) \rangle + 2\sigma_2^2 \|y^{k+1} - y^k\|^2 \\ & - 2\zeta \langle (\mathbf{W}(k) \otimes \mathbf{I}_d)(y_g^k + z_g^k), y_g^k + z_g^k - (y^* + z^*) \rangle + 2\zeta^2 \|(\mathbf{W}(k) \otimes \mathbf{I}_d)(y_g^k + z_g^k)\|^2 \\ & = \|y_g^k + z_g^k - (y^* + z^*)\|^2 + 2\sigma_2 \langle y^{k+1} - y^k, y_g^k + z_g^k - (y^* + z^*) \rangle + 2\sigma_2^2 \|y^{k+1} - y^k\|^2 \\ & - 2\zeta \langle (\mathbf{W}(k) \otimes \mathbf{I}_d)(y_g^k + z_g^k), y_g^k + z_g^k \rangle + 2\zeta^2 \|(\mathbf{W}(k) \otimes \mathbf{I}_d)(y_g^k + z_g^k)\|^2. \end{aligned}$$

Using  $\zeta$  definition (45) we get

$$\begin{aligned} & \|y_f^{k+1} + z_f^{k+1} - (y^* + z^*)\|^2 \\ & \leq \|y_g^k + z_g^k - (y^* + z^*)\|^2 + 2\sigma_2 \langle y^{k+1} - y^k, y_g^k + z_g^k - (y^* + z^*) \rangle + 2\sigma_2^2 \|y^{k+1} - y^k\|^2 \\ & - \langle (\mathbf{W}(k) \otimes \mathbf{I}_d)(y_g^k + z_g^k), y_g^k + z_g^k \rangle + \frac{1}{2} \|(\mathbf{W}(k) \otimes \mathbf{I}_d)(y_g^k + z_g^k)\|^2 \\ & = \|y_g^k + z_g^k - (y^* + z^*)\|^2 + 2\sigma_2 \langle y^{k+1} - y^k, y_g^k + z_g^k - (y^* + z^*) \rangle + 2\sigma_2^2 \|y^{k+1} - y^k\|^2 \\ & - \frac{1}{2} \|(\mathbf{W}(k) \otimes \mathbf{I}_d)(y_g^k + z_g^k)\|^2 - \frac{1}{2} \|y_g^k + z_g^k\|^2 + \frac{1}{2} \|(\mathbf{W}(k) \otimes \mathbf{I}_d)(y_g^k + z_g^k) - (y_g^k + z_g^k)\|^2 \\ & + \frac{1}{2} \|(\mathbf{W}(k) \otimes \mathbf{I}_d)(y_g^k + z_g^k)\|^2 \\ & \leq \|y_g^k + z_g^k - (y^* + z^*)\|^2 + 2\sigma_2 \langle y^{k+1} - y^k, y_g^k + z_g^k - (y^* + z^*) \rangle + 2\sigma_2^2 \|y^{k+1} - y^k\|^2 \\ & - \frac{1}{2} \|y_g^k + z_g^k\|_{\mathbf{P}}^2 + \frac{1}{2} \|(\mathbf{W}(k) \otimes \mathbf{I}_d)(y_g^k + z_g^k) - (y_g^k + z_g^k)\|_{\mathbf{P}}^2 \\ & = \|y_g^k + z_g^k - (y^* + z^*)\|^2 + 2\sigma_2 \langle y^{k+1} - y^k, y_g^k + z_g^k - (y^* + z^*) \rangle + 2\sigma_2^2 \|y^{k+1} - y^k\|^2 \\ & - \frac{1}{2} \|y_g^k + z_g^k\|_{\mathbf{P}}^2 + \frac{1}{2} \|(\mathbf{W}(k) \otimes \mathbf{I}_d)\mathbf{P}(y_g^k + z_g^k) - \mathbf{P}(y_g^k + z_g^k)\|^2. \end{aligned}$$

Using condition (3) we get

$$\|y_f^{k+1} + z_f^{k+1} - (y^* + z^*)\|^2$$

$$\begin{aligned} &\leq \|y_g^k + z_g^k - (y^* + z^*)\|^2 + 2\sigma_2 \langle y^{k+1} - y^k, y_g^k + z_g^k - (y^* + z^*) \rangle + 2\sigma_2^2 \|y^{k+1} - y^k\|^2 \\ &\quad - (2\chi)^{-1} \|y_g^k + z_g^k\|_{\mathbf{P}}^2. \end{aligned}$$

Rearranging gives

$$\begin{aligned} &-2 \langle y^{k+1} - y^k, y_g^k + z_g^k - (y^* + z^*) \rangle \\ &\leq \frac{1}{\sigma_2} \|y_g^k + z_g^k - (y^* + z^*)\|^2 - \frac{1}{\sigma_2} \|y_f^{k+1} + z_f^{k+1} - (y^* + z^*)\|^2 \\ &\quad + 2\sigma_2 \|y^{k+1} - y^k\|^2 - \frac{1}{2\sigma_2\chi} \|y_g^k + z_g^k\|_{\mathbf{P}}^2. \end{aligned}$$

□

**Lemma 10.** Let  $\delta$  be defined as follows:

$$\delta = \frac{1}{17L}. \quad (47)$$

Let  $\gamma$  be defined as follows:

$$\gamma = \frac{\nu}{14\sigma_2\chi^2}. \quad (48)$$

Let  $\theta$  be defined as follows:

$$\theta = \frac{\nu}{4\sigma_2}. \quad (49)$$

Let  $\sigma_2$  be defined as follows:

$$\sigma_2 = \frac{\sqrt{\mu}}{16\chi\sqrt{L}}. \quad (50)$$

Let  $\Psi_{yz}^k$  be the following Lyapunov function

$$\begin{aligned} \Psi_{yz}^k &= \left(\frac{1}{\theta} + \frac{\beta}{2}\right) \|y^k - y^*\|^2 + \frac{\beta}{2\sigma_2} \|y_f^k - y^*\|^2 + \frac{1}{\gamma} \|\hat{z}^k - z^*\|^2 \\ &\quad + \frac{4}{3\gamma} \|m^k\|_{\mathbf{P}}^2 + \frac{\nu^{-1}}{\sigma_2} \|y_f^k + z_f^k - (y^* + z^*)\|^2. \end{aligned} \quad (51)$$

Then the following inequality holds:

$$\Psi_{yz}^{k+1} \leq \left(1 - \frac{\sqrt{\mu}}{32\chi\sqrt{L}}\right) \Psi_{yz}^k + \mathsf{D}_F(x_g^k, x^*) - \frac{\nu}{2} \|x_g^k - x^*\|^2 - 2 \langle x^{k+1} - x^*, y^{k+1} - y^* \rangle. \quad (52)$$

*Proof.* Combining (40) and (43) gives

$$\begin{aligned} &\left(\frac{1}{\theta} + \frac{\beta}{2}\right) \|y^{k+1} - y^*\|^2 + \frac{\beta}{2\sigma_2} \|y_f^{k+1} - y^*\|^2 + \frac{1}{\gamma} \|\hat{z}^{k+1} - z^*\|^2 + \frac{4}{3\gamma} \|m^{k+1}\|_{\mathbf{P}}^2 \\ &\leq \left(\frac{1}{\gamma} - \delta\right) \|\hat{z}^k - z^*\|^2 + \left(1 - (4\chi)^{-1} + \frac{3\gamma\delta}{2}\right) \frac{4}{3\gamma} \|m^k\|_{\mathbf{P}}^2 + \frac{1}{\theta} \|y^k - y^*\|^2 + \frac{\beta(1 - \sigma_2/2)}{2\sigma_2} \|y_f^k - y^*\|^2 \\ &\quad - 2\nu^{-1} \langle y_g^k + z_g^k - (y^* + z^*), y^k + z^k - (y^* + z^*) \rangle - 2\nu^{-1} \langle y_g^k + z_g^k - (y^* + z^*), y^{k+1} - y^k \rangle \\ &\quad + \gamma\nu^{-2} (1 + 6\chi) \|y_g^k + z_g^k\|_{\mathbf{P}}^2 + \left(\frac{\beta\sigma_2^2}{4} - \frac{1}{\theta}\right) \|y^{k+1} - y^k\|^2 + 2\delta \|z_g^k - z^*\|^2 - \frac{\beta}{4} \|y_g^k - y^*\|^2 \\ &\quad + \mathsf{D}_F(x_g^k, x^*) - \frac{\nu}{2} \|x_g^k - x^*\|^2 - 2 \langle x^{k+1} - x^*, y^{k+1} - y^* \rangle + (2\gamma\delta^2 - \delta) \|z_g^k - z^k\|^2. \end{aligned}$$

Using (44) and (46) we get

$$\begin{aligned} &\left(\frac{1}{\theta} + \frac{\beta}{2}\right) \|y^{k+1} - y^*\|^2 + \frac{\beta}{2\sigma_2} \|y_f^{k+1} - y^*\|^2 + \frac{1}{\gamma} \|\hat{z}^{k+1} - z^*\|^2 + \frac{4}{3\gamma} \|m^{k+1}\|_{\mathbf{P}}^2 \\ &\leq \left(\frac{1}{\gamma} - \delta\right) \|\hat{z}^k - z^*\|^2 + \left(1 - (4\chi)^{-1} + \frac{3\gamma\delta}{2}\right) \frac{4}{3\gamma} \|m^k\|_{\mathbf{P}}^2 + \frac{1}{\theta} \|y^k - y^*\|^2 + \frac{\beta(1 - \sigma_2/2)}{2\sigma_2} \|y_f^k - y^*\|^2 \end{aligned}$$

$$\begin{aligned}
& -2\nu^{-1}\|y_g^k + z_g^k - (y^* + z^*)\|^2 + \frac{\nu^{-1}(1 - \sigma_2/2)}{\sigma_2} (\|y_f^k + z_f^k - (y^* + z^*)\|^2 - \|y_g^k + z_g^k - (y^* + z^*)\|^2) \\
& + \frac{\nu^{-1}}{\sigma_2} \|y_g^k + z_g^k - (y^* + z^*)\|^2 - \frac{\nu^{-1}}{\sigma_2} \|y_f^{k+1} + z_f^{k+1} - (y^* + z^*)\|^2 + 2\nu^{-1}\sigma_2\|y^{k+1} - y^k\|^2 \\
& - \frac{\nu^{-1}}{2\sigma_2\chi} \|y_g^k + z_g^k\|_{\mathbf{P}}^2 + \gamma\nu^{-2} (1 + 6\chi) \|y_g^k + z_g^k\|_{\mathbf{P}}^2 + \left(\frac{\beta\sigma_2^2}{4} - \frac{1}{\theta}\right) \|y^{k+1} - y^k\|^2 + 2\delta\|z_g^k - z^*\|^2 \\
& - \frac{\beta}{4}\|y_g^k - y^*\|^2 + \mathbf{D}_F(x_g^k, x^*) - \frac{\nu}{2}\|x_g^k - x^*\|^2 - 2\langle x^{k+1} - x^*, y^{k+1} - y^* \rangle + (2\gamma\delta^2 - \delta) \|z_g^k - z^k\|^2 \\
& = \left(\frac{1}{\gamma} - \delta\right) \|z^k - z^*\|^2 + \left(1 - (4\chi)^{-1} + \frac{3\gamma\delta}{2}\right) \frac{4}{3\gamma} \|m^k\|_{\mathbf{P}}^2 + \frac{1}{\theta} \|y^k - y^*\|^2 + \frac{\beta(1 - \sigma_2/2)}{2\sigma_2} \|y_f^k - y^*\|^2 \\
& + \frac{\nu^{-1}(1 - \sigma_2/2)}{\sigma_2} \|y_f^k + z_f^k - (y^* + z^*)\|^2 - \frac{\nu^{-1}}{\sigma_2} \|y_f^{k+1} + z_f^{k+1} - (y^* + z^*)\|^2 \\
& + 2\delta\|z_g^k - z^*\|^2 - \frac{\beta}{4}\|y_g^k - y^*\|^2 + \nu^{-1} \left(\frac{1}{\sigma_2} - \frac{(1 - \sigma_2/2)}{\sigma_2} - 2\right) \|y_g^k + z_g^k - (y^* + z^*)\|^2 \\
& + \left(\gamma\nu^{-2} (1 + 6\chi) - \frac{\nu^{-1}}{2\sigma_2\chi}\right) \|y_g^k + z_g^k\|_{\mathbf{P}}^2 + \left(\frac{\beta\sigma_2^2}{4} + 2\nu^{-1}\sigma_2 - \frac{1}{\theta}\right) \|y^{k+1} - y^k\|^2 \\
& + (2\gamma\delta^2 - \delta) \|z_g^k - z^k\|^2 + \mathbf{D}_F(x_g^k, x^*) - \frac{\nu}{2}\|x_g^k - x^*\|^2 - 2\langle x^{k+1} - x^*, y^{k+1} - y^* \rangle \\
& = \left(\frac{1}{\gamma} - \delta\right) \|z^k - z^*\|^2 + \left(1 - (4\chi)^{-1} + \frac{3\gamma\delta}{2}\right) \frac{4}{3\gamma} \|m^k\|_{\mathbf{P}}^2 + \frac{1}{\theta} \|y^k - y^*\|^2 + \frac{\beta(1 - \sigma_2/2)}{2\sigma_2} \|y_f^k - y^*\|^2 \\
& + \frac{\nu^{-1}(1 - \sigma_2/2)}{\sigma_2} \|y_f^k + z_f^k - (y^* + z^*)\|^2 - \frac{\nu^{-1}}{\sigma_2} \|y_f^{k+1} + z_f^{k+1} - (y^* + z^*)\|^2 \\
& + 2\delta\|z_g^k - z^*\|^2 - \frac{\beta}{4}\|y_g^k - y^*\|^2 - \frac{3\nu^{-1}}{2} \|y_g^k + z_g^k - (y^* + z^*)\|^2 + (2\gamma\delta^2 - \delta) \|z_g^k - z^k\|^2 \\
& + \left(\gamma\nu^{-2} (1 + 6\chi) - \frac{\nu^{-1}}{2\sigma_2\chi}\right) \|y_g^k + z_g^k\|_{\mathbf{P}}^2 + \left(\frac{\beta\sigma_2^2}{4} + 2\nu^{-1}\sigma_2 - \frac{1}{\theta}\right) \|y^{k+1} - y^k\|^2 \\
& + \mathbf{D}_F(x_g^k, x^*) - \frac{\nu}{2}\|x_g^k - x^*\|^2 - 2\langle x^{k+1} - x^*, y^{k+1} - y^* \rangle.
\end{aligned}$$

Using  $\beta$  definition (38) and  $\nu$  definition (34) we get

$$\begin{aligned}
& \left(\frac{1}{\theta} + \frac{\beta}{2}\right) \|y^{k+1} - y^*\|^2 + \frac{\beta}{2\sigma_2} \|y_f^{k+1} - y^*\|^2 + \frac{1}{\gamma} \|z^{k+1} - z^*\|^2 + \frac{4}{3\gamma} \|m^{k+1}\|_{\mathbf{P}}^2 \\
& \leq \left(\frac{1}{\gamma} - \delta\right) \|z^k - z^*\|^2 + \left(1 - (4\chi)^{-1} + \frac{3\gamma\delta}{2}\right) \frac{4}{3\gamma} \|m^k\|_{\mathbf{P}}^2 + \frac{1}{\theta} \|y^k - y^*\|^2 + \frac{\beta(1 - \sigma_2/2)}{2\sigma_2} \|y_f^k - y^*\|^2 \\
& + \frac{\nu^{-1}(1 - \sigma_2/2)}{\sigma_2} \|y_f^k + z_f^k - (y^* + z^*)\|^2 - \frac{\nu^{-1}}{\sigma_2} \|y_f^{k+1} + z_f^{k+1} - (y^* + z^*)\|^2 \\
& + 2\delta\|z_g^k - z^*\|^2 - \frac{1}{8L} \|y_g^k - y^*\|^2 - \frac{3}{\mu} \|y_g^k + z_g^k - (y^* + z^*)\|^2 + (2\gamma\delta^2 - \delta) \|z_g^k - z^k\|^2 \\
& + \left(\gamma\nu^{-2} (1 + 6\chi) - \frac{\nu^{-1}}{2\sigma_2\chi}\right) \|y_g^k + z_g^k\|_{\mathbf{P}}^2 + \left(\frac{\beta\sigma_2^2}{4} + 2\nu^{-1}\sigma_2 - \frac{1}{\theta}\right) \|y^{k+1} - y^k\|^2 \\
& + \mathbf{D}_F(x_g^k, x^*) - \frac{\nu}{2}\|x_g^k - x^*\|^2 - 2\langle x^{k+1} - x^*, y^{k+1} - y^* \rangle.
\end{aligned}$$

Using  $\delta$  definition (47) we get

$$\begin{aligned}
& \left(\frac{1}{\theta} + \frac{\beta}{2}\right) \|y^{k+1} - y^*\|^2 + \frac{\beta}{2\sigma_2} \|y_f^{k+1} - y^*\|^2 + \frac{1}{\gamma} \|z^{k+1} - z^*\|^2 + \frac{4}{3\gamma} \|m^{k+1}\|_{\mathbf{P}}^2 \\
& \leq \left(\frac{1}{\gamma} - \delta\right) \|z^k - z^*\|^2 + \left(1 - (4\chi)^{-1} + \frac{3\gamma\delta}{2}\right) \frac{4}{3\gamma} \|m^k\|_{\mathbf{P}}^2 + \frac{1}{\theta} \|y^k - y^*\|^2 + \frac{\beta(1 - \sigma_2/2)}{2\sigma_2} \|y_f^k - y^*\|^2 \\
& + \frac{\nu^{-1}(1 - \sigma_2/2)}{\sigma_2} \|y_f^k + z_f^k - (y^* + z^*)\|^2 - \frac{\nu^{-1}}{\sigma_2} \|y_f^{k+1} + z_f^{k+1} - (y^* + z^*)\|^2
\end{aligned}$$

$$\begin{aligned}
& + \left( \gamma \nu^{-2} (1 + 6\chi) - \frac{\nu^{-1}}{2\sigma_2\chi} \right) \|y_g^k + z_g^k\|_{\mathbf{P}}^2 + \left( \frac{\beta\sigma_2^2}{4} + 2\nu^{-1}\sigma_2 - \frac{1}{\theta} \right) \|y^{k+1} - y^k\|^2 \\
& + (2\gamma\delta^2 - \delta) \|z_g^k - z^k\|^2 + D_F(x_g^k, x^*) - \frac{\nu}{2} \|x_g^k - x^*\|^2 - 2\langle x^{k+1} - x^*, y^{k+1} - y^* \rangle.
\end{aligned}$$

Using  $\gamma$  definition (48) we get

$$\begin{aligned}
& \left( \frac{1}{\theta} + \frac{\beta}{2} \right) \|y^{k+1} - y^*\|^2 + \frac{\beta}{2\sigma_2} \|y_f^{k+1} - y^*\|^2 + \frac{1}{\gamma} \|\hat{z}^{k+1} - z^*\|^2 + \frac{4}{3\gamma} \|m^{k+1}\|_{\mathbf{P}}^2 \\
& \leq \left( \frac{1}{\gamma} - \delta \right) \|z^k - z^*\|^2 + \left( 1 - (4\chi)^{-1} + \frac{3\gamma\delta}{2} \right) \frac{4}{3\gamma} \|m^k\|_{\mathbf{P}}^2 + \frac{1}{\theta} \|y^k - y^*\|^2 + \frac{\beta(1 - \sigma_2/2)}{2\sigma_2} \|y_f^k - y^*\|^2 \\
& + \frac{\nu^{-1}(1 - \sigma_2/2)}{\sigma_2} \|y_f^k + z_f^k - (y^* + z^*)\|^2 - \frac{\nu^{-1}}{\sigma_2} \|y_f^{k+1} + z_f^{k+1} - (y^* + z^*)\|^2 \\
& + \left( \frac{\beta\sigma_2^2}{4} + 2\nu^{-1}\sigma_2 - \frac{1}{\theta} \right) \|y^{k+1} - y^k\|^2 + (2\gamma\delta^2 - \delta) \|z_g^k - z^k\|^2 \\
& + D_F(x_g^k, x^*) - \frac{\nu}{2} \|x_g^k - x^*\|^2 - 2\langle x^{k+1} - x^*, y^{k+1} - y^* \rangle.
\end{aligned}$$

Using  $\theta$  definition together with (34), (38) and (50) gives

$$\begin{aligned}
& \left( \frac{1}{\theta} + \frac{\beta}{2} \right) \|y^{k+1} - y^*\|^2 + \frac{\beta}{2\sigma_2} \|y_f^{k+1} - y^*\|^2 + \frac{1}{\gamma} \|\hat{z}^{k+1} - z^*\|^2 + \frac{4}{3\gamma} \|m^{k+1}\|_{\mathbf{P}}^2 \\
& \leq \left( \frac{1}{\gamma} - \delta \right) \|z^k - z^*\|^2 + \left( 1 - (4\chi)^{-1} + \frac{3\gamma\delta}{2} \right) \frac{4}{3\gamma} \|m^k\|_{\mathbf{P}}^2 + \frac{1}{\theta} \|y^k - y^*\|^2 + \frac{\beta(1 - \sigma_2/2)}{2\sigma_2} \|y_f^k - y^*\|^2 \\
& + \frac{\nu^{-1}(1 - \sigma_2/2)}{\sigma_2} \|y_f^k + z_f^k - (y^* + z^*)\|^2 - \frac{\nu^{-1}}{\sigma_2} \|y_f^{k+1} + z_f^{k+1} - (y^* + z^*)\|^2 \\
& + (2\gamma\delta^2 - \delta) \|z_g^k - z^k\|^2 + D_F(x_g^k, x^*) - \frac{\nu}{2} \|x_g^k - x^*\|^2 - 2\langle x^{k+1} - x^*, y^{k+1} - y^* \rangle.
\end{aligned}$$

Using  $\gamma$  definition (48) and  $\delta$  definition (47) we get

$$\begin{aligned}
& \left( \frac{1}{\theta} + \frac{\beta}{2} \right) \|y^{k+1} - y^*\|^2 + \frac{\beta}{2\sigma_2} \|y_f^{k+1} - y^*\|^2 + \frac{1}{\gamma} \|\hat{z}^{k+1} - z^*\|^2 + \frac{4}{3\gamma} \|m^{k+1}\|_{\mathbf{P}}^2 \\
& \leq \left( \frac{1}{\gamma} - \delta \right) \|z^k - z^*\|^2 + (1 - (8\chi)^{-1}) \frac{4}{3\gamma} \|m^k\|_{\mathbf{P}}^2 + \frac{1}{\theta} \|y^k - y^*\|^2 + \frac{\beta(1 - \sigma_2/2)}{2\sigma_2} \|y_f^k - y^*\|^2 \\
& + \frac{\nu^{-1}(1 - \sigma_2/2)}{\sigma_2} \|y_f^k + z_f^k - (y^* + z^*)\|^2 - \frac{\nu^{-1}}{\sigma_2} \|y_f^{k+1} + z_f^{k+1} - (y^* + z^*)\|^2 \\
& + D_F(x_g^k, x^*) - \frac{\nu}{2} \|x_g^k - x^*\|^2 - 2\langle x^{k+1} - x^*, y^{k+1} - y^* \rangle.
\end{aligned}$$

After rearranging and using  $\Psi_{yz}^k$  definition (51) we get

$$\begin{aligned}
\Psi_{yz}^{k+1} & \leq \max \{ (1 + \theta\beta/2)^{-1}, (1 - \gamma\delta), (1 - \sigma_2/2), (1 - (8\chi)^{-1}) \} \Psi_{yz}^k \\
& + D_F(x_g^k, x^*) - \frac{\nu}{2} \|x_g^k - x^*\|^2 - 2\langle x^{k+1} - x^*, y^{k+1} - y^* \rangle \\
& \leq \left( 1 - \frac{\sqrt{\mu}}{32\chi\sqrt{L}} \right) \Psi_{yz}^k + D_F(x_g^k, x^*) - \frac{\nu}{2} \|x_g^k - x^*\|^2 - 2\langle x^{k+1} - x^*, y^{k+1} - y^* \rangle.
\end{aligned}$$

□



*Proof of Theorem 4.* Combining (36) and (52) gives

$$\begin{aligned}\Psi_x^{k+1} + \Psi_{yz}^{k+1} &\leq \left(1 - \frac{\sqrt{\mu}}{\sqrt{\mu} + 2\sqrt{L}}\right) \Psi_x^k + \left(1 - \frac{\lambda_{\min}\sqrt{\mu}}{32\lambda_{\max}\sqrt{L}}\right) \Psi_{yz}^k \\ &\leq \left(1 - \frac{\lambda_{\min}\sqrt{\mu}}{32\lambda_{\max}\sqrt{L}}\right) (\Psi_x^k + \Psi_{yz}^k).\end{aligned}$$

This implies

$$\Psi_x^k + \Psi_{yz}^k \leq \left(1 - \frac{\lambda_{\min}\sqrt{\mu}}{32\lambda_{\max}\sqrt{L}}\right)^k (\Psi_x^0 + \Psi_{yz}^0).$$

Using  $\Psi_x^k$  definition (35) we get

$$\|x^k - x^*\|^2 \leq \eta \Psi_x^k \leq \eta (\Psi_x^k + \Psi_{yz}^k) \leq \left(1 - \frac{\lambda_{\min}\sqrt{\mu}}{32\lambda_{\max}\sqrt{L}}\right)^k \eta (\Psi_x^0 + \Psi_{yz}^0).$$

Choosing  $C = \eta(\Psi_x^0 + \Psi_{yz}^0)$  and using the number of iterations

$$k = 32\chi\sqrt{L/\mu} \log \frac{C}{\epsilon} = \mathcal{O}\left(\chi\sqrt{L/\mu} \log \frac{1}{\epsilon}\right).$$

we get

$$\|x^k - x^*\|^2 \leq \epsilon,$$

which concludes the proof.  $\square$
